# 1 Transcriptome Mining Reveals a Spectrum of RNA

## 2 Viruses in Primitive Plants

3

4 Jonathon C.O. Mifsud<sup>a,b,#</sup>, Rachael V. Gallagher<sup>b,c</sup>, Edward C. Holmes<sup>a</sup>, Jemma L. Geoghegan<sup>d,e</sup>

5

6 <sup>a</sup>Sydney Institute for Infectious Diseases, School of Life and Environmental Sciences and  
7 School of Medical Sciences, The University of Sydney, Sydney, NSW 2006, Australia.

8 <sup>b</sup>Department of Biological Sciences, Macquarie University, North Ryde, NSW 2109 Australia

9 <sup>c</sup>Hawkesbury Institute for the Environment, Western Sydney University, Locked Bag 1797,

10 Penrith, NSW 2751, Australia

11 <sup>d</sup>Department of Microbiology and Immunology, University of Otago, Dunedin 9016, New  
12 Zealand.

13 <sup>e</sup>Institute of Environmental Science and Research, Wellington 5018, New Zealand.

14

15 Running Head: Mining Reveals RNA Viruses in Primitive Plants

16 #Address correspondence to: Jonathon C.O. Mifsud, [jmif9945@uni.sydney.edu.au](mailto:jmif9945@uni.sydney.edu.au)

17 Word Counts: Abstract 250, Importance 125, Text 9074.

18 Keywords: plant virus, virus discovery, algae virus, *Benyviridae*, *Bunyavirales*, *Secoviridae*,

19 evolution

## 20 **Abstract**

21 Current knowledge of plant viruses stems largely from those affecting economically important  
22 plants. Yet, plant species in cultivation represent a small and bias subset of the plant kingdom.  
23 Here, we describe virus diversity and abundance from a survey of 1079 transcriptomes from  
24 species across the breadth of the plant kingdom (Archaeplastida) by analysing open-source  
25 data from the One Thousand Plant Transcriptomes Initiative (1KP). We identified 104 potentially  
26 novel viruses, of which 40% comprised single-stranded positive-sense RNA viruses across eight  
27 orders, including members of the *Hepelivirales*, *Tymovirales*, *Cryppavirales*, *Martellivirales* and  
28 *Picornavirales*. One-third of the newly described viruses comprised double-stranded RNA  
29 viruses from the orders *Durnavirales* and *Ghabrivirales*. The remaining were negative-sense  
30 RNA viruses from the *Rhabdoviridae*, *Aspiviridae*, *Yueviridae*, *Phenuiviridae* and the newly  
31 proposed *Viridisbunyaviridae*. Our analysis considerably expands the known host range of 13  
32 virus families to include lower plants (e.g., *Benyviridae* and *Secoviridae*) and four virus families  
33 to include algae hosts (e.g., *Tymoviridae* and *Chrysoviridae*). The discovery of the first 30 kDa  
34 movement protein in a non-vascular plant, suggests that the acquisition of plant virus movement  
35 proteins occurred prior to the emergence of the plant vascular system. More broadly, however,  
36 a co-phylogeny analysis revealed that the evolutionary history of these families is largely driven  
37 by cross-species transmission events. Together, these data highlight that numerous RNA virus  
38 families are associated with older evolutionary plant lineages than previously thought and that  
39 the scarcity of RNA viruses found in lower plants to date likely reflects a lack of investigation  
40 rather than their absence.

41 **Importance**

42 Our knowledge of plant viruses is mainly limited to those infecting economically important host  
43 species. In particular, we know little about those viruses infecting primitive plant lineages such  
44 as the ferns, lycophytes, bryophytes and charophytes. To expand this understanding, we  
45 conducted a broad-scale viral survey of species across the breadth of the plant kingdom. We  
46 find that primitive plants harbour a wide diversity of RNA viruses including some that are  
47 sufficiently divergent to comprise a new virus family. The primitive plant virome we reveal offers  
48 key insights into the evolutionary history of core plant virus gene modules and genome  
49 segments. More broadly, this work emphasises that the scarcity of viruses found in these  
50 species to date likely reflects the absence of research in this area.

## 51 **1. Introduction**

52 Viruses are responsible for almost 50% of all emerging plant disease (1). Historically, virus  
53 identification and characterisation have focused on pathogenic viruses that infect species of  
54 economic importance with 69% of the current phytovirosphere — the total assemblage of  
55 viruses across the plant kingdom — discovered in cultivated plant species even though they  
56 represent less than 0.17% of all known plant diversity (2, 3). Importantly, the advent of  
57 metagenomic sequencing technology enables the comprehensive screening of plant tissues for  
58 novel and known viruses (4). Despite this, virus diversity in the vast majority of plants remains  
59 unquantified (5).

60 Our ability to infer the origins and diversification of the phytovirosphere from genomic data  
61 requires adequate sampling of the viruses across the plant kingdom. Several key plant groups  
62 are severely underrepresented or absent in previous studies of the phytovirosphere, including  
63 green algae (excluding the Chlorophytes), lower plants, gymnosperms and several angiosperm  
64 orders (5, 6). Improving knowledge across these groups will undoubtedly help uncover the  
65 evolutionary history of plant virus lineages. For instance, an analysis of the evolutionary history  
66 of viruses from algal ancestors might reveal deep associations that shaped the trajectory of  
67 plant evolution, including how the key evolutionary transitions of plants – such as  
68 terrestrialisation – have shaped the contemporary land plant virome (5). Similarly, through broad  
69 sampling across the plant kingdom, we can gain a stronger understanding of the acquisition of  
70 viruses through cross-species transmission from plant-associated organisms such as  
71 invertebrates, fungi, or protists (5).

72 The majority (68%) of the currently documented genera of plant viruses have positive-sense  
73 single-stranded RNA (+ssRNA) genomes and the majority of virus diversity is known only from  
74 angiosperms (7) (Figure 1). Currently, 16 viruses belonging to 12 virus families have been found



75 in gymnosperms (8-12). Outside of several viruses found in ferns, we know little of the diversity  
76 of viruses in the lycophytes, bryophytes and charophytes that together encompass ~27,000  
77 species (13-16) (Figure 1). A partial analysis of published transcriptome data detected  
78 homologs of the canonical RNA virus RNA-dependent RNA polymerase (RdRp) in algae,  
79 several lower plants and gymnosperms (17). However, it is yet to be determined whether  
80 viruses that infect freshwater algae – that include the *Zygnematophyceae* ancestors of land  
81 plants – resemble those infecting angiosperms or that of the green algae (chlorophytes) which  
82 are dominated by double-stranded DNA (dsDNA) viruses particularly from the *Phycodnaviridae*  
83 (18). To date, two +ssRNA viruses related to the benyvirids have been identified in freshwater  
84 algae (19, 20). Unlike the Chlorophyta, the Charophyta characteristically contain  
85 plasmodesmata and homologs of the key components of the land plant innate immune system,  
86 both of which have been speculated to explain the absence of double-strand (ds) DNA viruses  
87 in land plants (5, 21, 22). An understanding of the viruses infecting the Charophyta and other  
88 lower plants is required to effectively test these ideas.

89 Transcriptome mining has become an inexpensive and efficient method of virus discovery that  
90 leverages previous investment (23-29). To this end, we mined the transcriptome data generated  
91 by the One Thousand Plant Transcriptomes Initiative (1KP) using sequence homology searches  
92 of known plant viruses. The 1KP project provides a major untapped source of polyA-selected  
93 transcriptome data for virus discovery drawn from species across the breadth of the plants in a  
94 broad sense including green plants (Viridiplantae), glaucophytes (Glaucophyta), red algae  
95 (Rhodophyta) (30, 31). Our broad aim was to revise our understanding of the phytovirosphere  
96 using data across the plant kingdom and undertake phylogenetic analyses of plant viruses to  
97 provide insights into their origins and diversification.

## 98 **2. Methods**

## 99 **2.1 Transcriptome data generation**

100 The 1KP generated RNA sequencing libraries from 1,143 species across the breadth of the  
101 plant kingdom (30). In addition, 30 Chromista and red alga species were also included. Due to  
102 the diversity of species examined, samples were obtained from multiple sources including field  
103 collections, greenhouses, culture collections and laboratory specimens (32). For the majority of  
104 species, young leaves or shoots were collected, although occasionally a mix of vegetative and  
105 reproductive tissues was used. To avoid RNA degradation, RNA extraction was performed  
106 immediately after tissue collection or tissue was frozen in liquid nitrogen and stored in a -80°C  
107 until extraction (32). Several extraction protocols were used including CTAB and TRIzol (see  
108 (32) for complete details). All sequencing was conducted at BGI-Shenzhen, China, using a  
109 combination of in-house protocols or TruSeq chemistry (32). All libraries were prepared from  
110 polyA RNA. Paired-end sequencing was initially completed using Illumina GAII machines (11%  
111 of libraries) with a ~72bp read length but later the HiSeq platform was used (89% of libraries)  
112 with a 90 bp read length (32).

## 113 **2.2 Surveying for viruses in the 1KP**

114 Raw transcriptomes (n = 1079, belonging to 960 plants species) from the 1KP major release  
115 were downloaded from the NCBI Short Read Archive (SRA) database (BioProject accession  
116 PRJEB21674) and converted to FASTQ format using the SRA Toolkit program fastq-dump in  
117 combination with the parallel-fastq-dump wrapper (<https://github.com/rvalieris/parallel-fastq-dump>)  
118 dump) (33). One hundred transcriptomes within the BioProject were not publicly available  
119 (released 22/08/2019) at the commencement of this study and thus not analysed.  
120 Transcriptomes from the 1KP pilot study (BioProject accession PRJEB4921) and secondary  
121 project (BioProject accession PRJEB8056) were similarly not analysed. To reduce the  
122 downstream computing resources needed, raw sequences were mapped to their respective

123 host genome scaffold using bowtie2 (34). Genome scaffolds were assembled as part of a  
124 previous study (30). Where genome scaffolds were not available (n = 2) all reads were  
125 assembled *de novo*. Trinity RNA-seq (v2.1.1) was used to quality trim and assemble *de novo*  
126 the unaligned reads captured from mapping (35). The assembled contigs were then assigned to  
127 known virus families and annotated through similarity searches against the NCBI nucleotide  
128 database (nt), the non-redundant protein database (nr) and a custom viral RdRp database using  
129 BLASTN and Diamond (BLASTX) (36, 37). To filter out weak BLAST sequence matches an e-  
130 value cut-off of  $1 \times 10^{-10}$  was employed. To identify potential false positives, putative viral  
131 contigs were manually compared across the three BLAST searches (nt, nr and RdRp) to ensure  
132 matches to virus-associated sequences were consistent.

### 133 **2.3 Virus filtering and abundance calculations**

134 For all analyses, we focused on virus families known to infect plants or algae. As our analyses  
135 rely on sequence-based similarity searches for virus detection it is necessarily biased towards  
136 viruses that exhibit to existing virus families. Together, the Virus-Host database (38) and the  
137 International Committee on Taxonomy of Viruses (39) were used to develop a list of plant virus  
138 families and genera to filter out virus-like contigs associated with vertebrate, invertebrate or  
139 fungi hosts based upon their top BLASTx and BLASTn matches. Packages within the Tidyverse  
140 collection (v1.3.0) in RStudio were used to complete these tasks (40-42). Where the host was  
141 ambiguous (e.g., belonged to a family or genera known to infect both plant and fungal species)  
142 the contig was inspected manually.

143 The relative abundance of each transcript within the host transcriptome was calculated using  
144 RNA-Seq by Expectation-Maximization (v1.2.28) (43). To account for variation in the number of  
145 unaligned reads between libraries after mapping, contig abundance was standardised by the

146 total number of unaligned paired reads. Contigs under 200 nucleotides in length were excluded  
147 from further analysis.

## 148 **2.4 Genome extension and annotation**

149 Where a novel virus-like contig was discovered, we re-assembled the complete library – without  
150 removing host reads – in an attempt to recover a complete virus genome. For all re-assembled  
151 libraries, we recalculated abundance measurements to account for both host and non-host  
152 reads. The recalculated abundance measurements are shown in Supplementary Table 4. We  
153 further re-assembled all libraries belonging to non-flowering plants (n = 402). Reads were  
154 mapped onto virus-like contigs using Bbmap and heterogeneous coverage and potential  
155 misassemblies were manually resolved using Geneious (v11.0.9) (44, 45).

156 To determine whether a virus was novel, we followed the criteria as specified by The  
157 International Committee on Taxonomy of Viruses (39) (<http://www.ictvonline.org/>). Novel viruses  
158 were named using a combination of the host common name - if documented – and the  
159 associated virus taxonomic group (e.g., *Interrupted club-moss deltapartivirus*). In cases where  
160 host assignment proved difficult the suffix “associated” was added to the host name to signify  
161 this (e.g., *Calypogeia fissa associated deltaflexivirus*). Where the taxonomic position of a virus  
162 was ambiguous the suffix “-like” was used (e.g., *Goldenrod fern qin-like virus*). Virus acronyms  
163 were created using a combination of the first and/or second letters of the host common name - if  
164 documented – and virus taxonomic group (e.g., *Leucodon julaceus beny-like virus* (LjBV)).  
165 Where multiple related viruses were found in the same host, we assigned each a number (e.g.,  
166 *Odontoschisma prostratum bunyavirus 3* (OdprBV3)).

167 The percentage identity among virus sequences was calculated via multiple sequence  
168 alignments using Clustal Omega (v1.2.3) (46). The RdRp protein coding domain was used for

169 all sequence alignments. Percentage identity matrices were converted to heat map plots using a  
170 custom R script provided by (28).

171 To characterise functional domains, predicted protein sequences along with their closest viral  
172 relatives were subjected to a domain-based search using the Conserved Domain Database  
173 (v3.18) (<https://www.ncbi.nlm.nih.gov/Structure/cdd/cdd.shtml>) and cross-referenced with the  
174 PFAM (v34.0) and Uniclust30 (v2018\_08) databases available within the MMseqs2 webserver  
175 (47). To recover additional annotations, we used HHpred within the MPI Bioinformatics Toolkit  
176 webserver to query the PDB\_mmCIF70 (v.12\_Oct), SCOPe70 (v2.08), UniProt-SwissProt-  
177 viral70 (v3\_Nov\_2021) and TIGRFAMs (v15.0) databases (48). Virus genome diagrams were  
178 produced using the program littlegenomes (49). Where available NCBI/GenBank CDS  
179 information was used to annotate reference virus sequences (50).

## 180 **2.5 Detection of endogenous virus elements**

181 All genome scaffolds produced by the 1KP were used as a database in which we queried using  
182 the protein translations of the viruses discovered in this study. Endogenous viral elements (i.e.,  
183 EVEs) were detected using the tblastn algorithm (51). The search threshold was limited to 100  
184 amino acids in length with an e-value cut off of  $1 \times 10^{-20}$ . Where multiple hits across several plant  
185 scaffolds were observed we manually examined the sequence. Suspected endogenous virus  
186 sequences were queried against a subset whole-genome shotgun contig database which  
187 included green plants (taxid: 33090) and red algae (taxid: 2763). In addition, the virus-like  
188 sequences discovered in this study were checked for host gene contamination using the  
189 contamination function implemented in CheckV (v0.8.1) (52). All potential endogenous  
190 sequences were removed from further analyses.

## 191 **2.6 Assessing library contamination by eukaryotes, bacteria, and protozoa**

192 For libraries in which a novel virus was discovered we investigated whether reads belonging to  
193 other eukaryotes were also present in the sequencing libraries. To achieve this, we obtained  
194 taxonomic identification for raw reads in each library – without the removal of host reads – by  
195 aligning them to the NCBI nt database using the KMA aligner and the CCMetagen program (53,  
196 54). Sequence abundance was calculated by counting the number of nucleotides matching the  
197 reference sequence with an additional correction for template length (the default parameter in  
198 KMA). Krona charts generated by CCMetagen were edited were further edited in Adobe  
199 Illustrator (<https://www.adobe.com>) (55). Library contamination was also assessed by the 1KP  
200 and used to inform our host-virus assignments (31).

## 201 **2.7 Phylogenetic analysis of plant viruses**

202 Phylogenetic trees of the plant-associated viruses discovered here were inferred using a  
203 maximum likelihood approach. We combined our translated virus contigs with known virus  
204 protein sequences from each respective virus family taken from NCBI/GenBank (50).  
205 Sequences were then aligned with the program Clustal Omega (v1.2.3) with default parameters  
206 (46). Sites of ambiguity were removed using trimAl (v1.2) (56). To estimate phylogenetic trees,  
207 selection of the best-fit model of amino acid substitution was determined using the Akaike  
208 information criterion, corrected AIC, and the Bayesian information criterion with the ModelFinder  
209 function (-m MFP) in IQ-TREE (57, 58). All phylogenetic trees were created using IQ-TREE with  
210 1000 bootstrap replicates. Phylogenetic trees were annotated with FigTree (v1.4.4) (59) and  
211 further edited in Adobe Illustrator (<https://www.adobe.com>).

212 To visualise the occurrence of cross-species transmission and virus-host co-divergence across  
213 plant virus families, we reconciled the co-phylogenetic relationship between viruses and their  
214 hosts. For each select plant virus family, a vascular plant host cladogram was constructed using

215 trees from (60) and (61), using the R package V.PhyloMaker (v0.1.0) (62). As lower plants and  
216 non-plant species are not present in the V.PhyloMaker megatree, these hosts were added to the  
217 cladogram using the software phyloT, a phylogenetic tree generator based on NCBI taxonomy  
218 (<http://phyloT.biobyte.de/>) as well as topologies available in the appropriate literature. The host  
219 information was obtained from the NCBI Virus database (accessed 14/12/2021) and available  
220 literature (63) A tanglegram that graphically represents the correspondence between host and  
221 virus trees was created using the R packages phytools (v0.7-80) and APE (v5.5) (64, 65). Virus  
222 sequences from each family were obtained through a broad survey of all virus genomic data  
223 available on GenBank. The virus phylogenies used in the co-phylogenies were constructed as  
224 detailed above. To quantify the relative frequencies of cross-species transmission versus virus-  
225 host co-divergence we reconciled the co-phylogenetic relationship between viruses and their  
226 hosts using the Jane co-phylogenetic software package (66). Jane employs a maximum  
227 parsimony approach to determine the best ‘map’ of the virus phylogeny onto the host  
228 phylogeny. The cost of duplication, host-jump and extinction event types were set to one, while  
229 host-virus co-divergence was set to zero as it was considered the likely null event. Following the  
230 parsimony principle, the reconciliation proceeds by minimising the total event cost. The number  
231 of generations and the population size was both set to 100. Jane was chosen over its successor  
232 eMPress as it allows for a virus to be associated with multiple host species and handle  
233 polytomies (67). For a multi-host virus, we represented each association as a polytomy on the  
234 virus phylogeny.

## 235 **2.8 Assigning plant host clades**

236 Each plant host was assigned to each clade in a previous study based upon their phylogenetic  
237 positioning and lineage information (30). To improve clarity when colouring the phylogenies  
238 (although not the tanglegrams) we reduced the number of clades from 25 to ten (core eudicots,

239 basal eudicots, monocots, basalmost angiosperms, gymnosperms, fern and fern allies, non-  
240 vascular, green algae, red algae and lastly Chromista) by combining those that were closely  
241 related or potentially overlapping to increase the number of species in each group (SI Table 1).

## 242 **2.9 Data availability**

243 The raw One Thousand Plant Transcriptomes Initiative sequence reads are available at  
244 BioProject PRJEB21674. All viral genomes and corresponding sequences assembled in this  
245 study have been deposited in NCBI GenBank and assigned accession numbers xxxx-yyyy.

## 246 **3. Results**

247 We characterised the viruses found in the transcriptomes of 960 plant species within the 1KP  
248 major release. The transcriptomes represented a broad taxonomic sampling across the  
249 Archaeplastida (green plants, glaucophytes and red algae). Sequencing libraries had a median  
250 of 25,187,714 paired reads (range 10,156,464–46,650,336). A median of 82% of reads (range  
251 1%-96%) in these libraries mapped to host genome scaffolds and were subsequently removed.  
252 *De novo* assembly of the sequencing reads resulted in a median of 36,015 contigs (range  
253 1,396–146,217) per library, with a total of 41,256,176 contigs generated (SI Table 2).

### 254 **3.1 Diversity and abundance of plant viruses**

255 In total, virus-like transcripts were found for 603 plant species; 69% of these were plant-  
256 associated while numerous identified sequences shared high similarity to non-plant associated  
257 viruses including those known to infect fungi, invertebrate and vertebrate hosts. Among the non-  
258 plant-associated virus transcripts, 34% were unclassified (10% of total virus-like transcripts)  
259 such that they were most closely related to a virus sequence with little to no taxonomic  
260 information (i.e., a virus sequence classified as only belonging to the *Riboviria*). If an RdRp-like  
261 region was detected in an unclassified virus-like transcript we further assessed whether it could



262 be plant-associated (see Phylogenetic analysis of identified viruses). The remaining non-plant-  
263 associated virus transcripts were largely classified within the *Orthomyxoviridae* (vertebrate  
264 associated) (25%), *Rhabdoviridae* (invertebrate associated) (17%), *Partitiviridae* (fungus  
265 associated) (10%), *Mimiviridae* (amoeboid associated) (10%) and *Adenoviridae* (vertebrate  
266 associated) (7%) and excluded from the remainder of this study. These sequences are  
267 discussed in more detail in the section on “Presence of contaminants in sequencing libraries”  
268 below. Although some of these viruses could represent plant infection it remains challenging to  
269 discern and we, therefore, made the conservative decision to remove them from the analysis.

270 We detected transcripts closely associated with viruses containing single and double-stranded  
271 DNA and RNA genomes. The majority of virus-like sequences belonged to families with  
272 +ssRNA genomes (61%) or reverse-transcribing dsDNA viruses (22%) (Figure 1). The +ssRNA  
273 virus transcripts were predominately classified within the *Betaflexiviridae* (30%), *Potyviridae*  
274 (19%), *Secoviridae* (16%) and *Alphaflexiviridae* (10%) (SI Table 3). Negative-sense single-  
275 stranded RNA (-ssRNA) virus transcripts were classified within the *Aspiviridae* (0.04%),  
276 *Rhabdoviridae* (6%) and *Tospoviridae* (3%) (*Phenuiviridae* and *Yueviridae* transcripts were later  
277 detected in the unclassified virus-like transcripts) (SI Table 3). dsDNA virus transcripts with  
278 sequence similarities to the *Phycodnaviridae* were detected across the algae samples. These  
279 phycodna-like virus transcripts frequently encoded the chitinase and DNA ligase genes which  
280 are homologous to those in distantly related host organisms including fungi and bacteria. Due to  
281 the difficulties discerning whether these transcripts represent *Phycodnaviridae* sequences or  
282 contamination, we excluded all phycodnavirus-related sequences. All remaining dsDNA viruses  
283 were exclusively reverse-transcribing viruses from the *Caulimoviridae*. We failed to detect any  
284 sequences that shared homology with several plant virus families including *Reoviridae*,  
285 *Nanoviridae* and *Fimoviridae* (although see the Discussion for caveats).

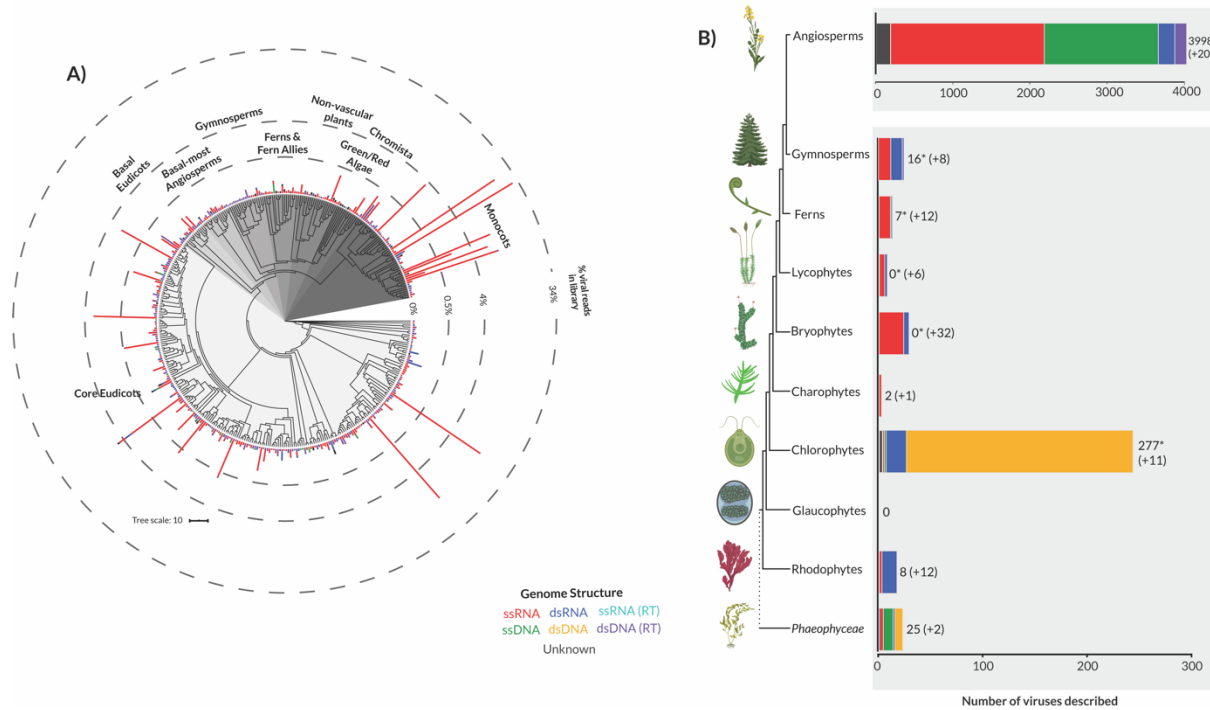

286

287 **Figure 1.** (A) Phylogram of virus composition across the One Thousand Plant Transcriptomes

288 Initiative (1KP) samples. Plant-associated virus abundance was summarised for each plant

289 species and normalised using a Box-Cox transformation. The height of each bar represents the

290 percentage of virus reads detected in each plant species (after the removal of host reads). Plant

291 clades are labelled and differentiated by shades of grey. The 1KP ASTRAL tree was used as

292 the basis for this tree (30). Clade and abundance annotations were added using the Interactive

293 Tree of Life (iTOL) web-based tool (109). (B) The phytovirosphere across the Plantae and

294 *Phaeophyceae*. A schematic tree of the evolution of major plant groups. Each bar represents

295 the number of total viruses formally or likely associated with each host group and is coloured by

296 virus genome composition. The total number of viruses for each plant group plus those found in

297 this study is also shown at the end of each bar. The Virus-Host (38) and NCBI virus databases

298 (110) combined with literature searches were used to obtain virus counts. Lineage branches are

299 not drawn to scale. To our knowledge, no viruses have been found in the Glaucophytes. Plant

300 and algae images were obtained from BioRender.com or drawn in Adobe Illustrator

301 (<https://www.adobe.com>). \*Transcriptome scaffolds from libraries belonging to these host  
302 groups shared homology to virus RdRps and were partially analysed but not assembled or  
303 deposited to GenBank (17).

304 There was a large range of total viral abundance in each library ( $5 \times 10^{-6}\%$  – 31% reads after  
305 host-associated reads were removed). Viruses with +ssRNA genomes accounted for the vast  
306 majority (99.8%) of virus abundance detected (Figure 1, SI Table 3). As expected, virus  
307 discovery was concentrated in the flowering plants (angiosperms), which have the highest  
308 number of previously classified viruses. For instance, plant virus-like sequences were frequently  
309 discovered in the core eudicots and monocots (i.e., 73% of libraries in which plant virus  
310 transcripts were found). The detection rate of plant viruses was highest in the most basal  
311 angiosperms (57%) and monocots (50%). No significant difference in virus abundance was  
312 observed between sequencing platforms (Genome Analyzer II and Illumina HiSeq 2000;  
313  $p=0.327$ ).

### 314 **3.2 Presence of contaminants in sequencing libraries**

315 The bacterial, fungal and insect species that live in or on plant tissues are commonly sampled  
316 within plant sequencing libraries (31), although contamination from other plants is also a  
317 possibility during sample preparation or sequencing. To quantify the extent of library  
318 contamination we used the KMA and CCMetagen tools (Figure 2). Among the libraries analysed  
319 ( $n = 95$ ), bacteria were consistently detected representing a median of 1.5% of total abundance  
320 (range 0.01%-33%). A median of 2% of library abundance was associated with fungi sequences  
321 (range 0%-53%). Arthropods and chordates were also commonly detected across libraries  
322 (found in 87 and 89 libraries, respectively) but at lower abundance (median 0.15%, range 0%-  
323 11.4%). The presence of chordate associated reads is likely attributed to various routes of  
324 sample contamination (e.g., faeces) or during sample processing and sequencing.

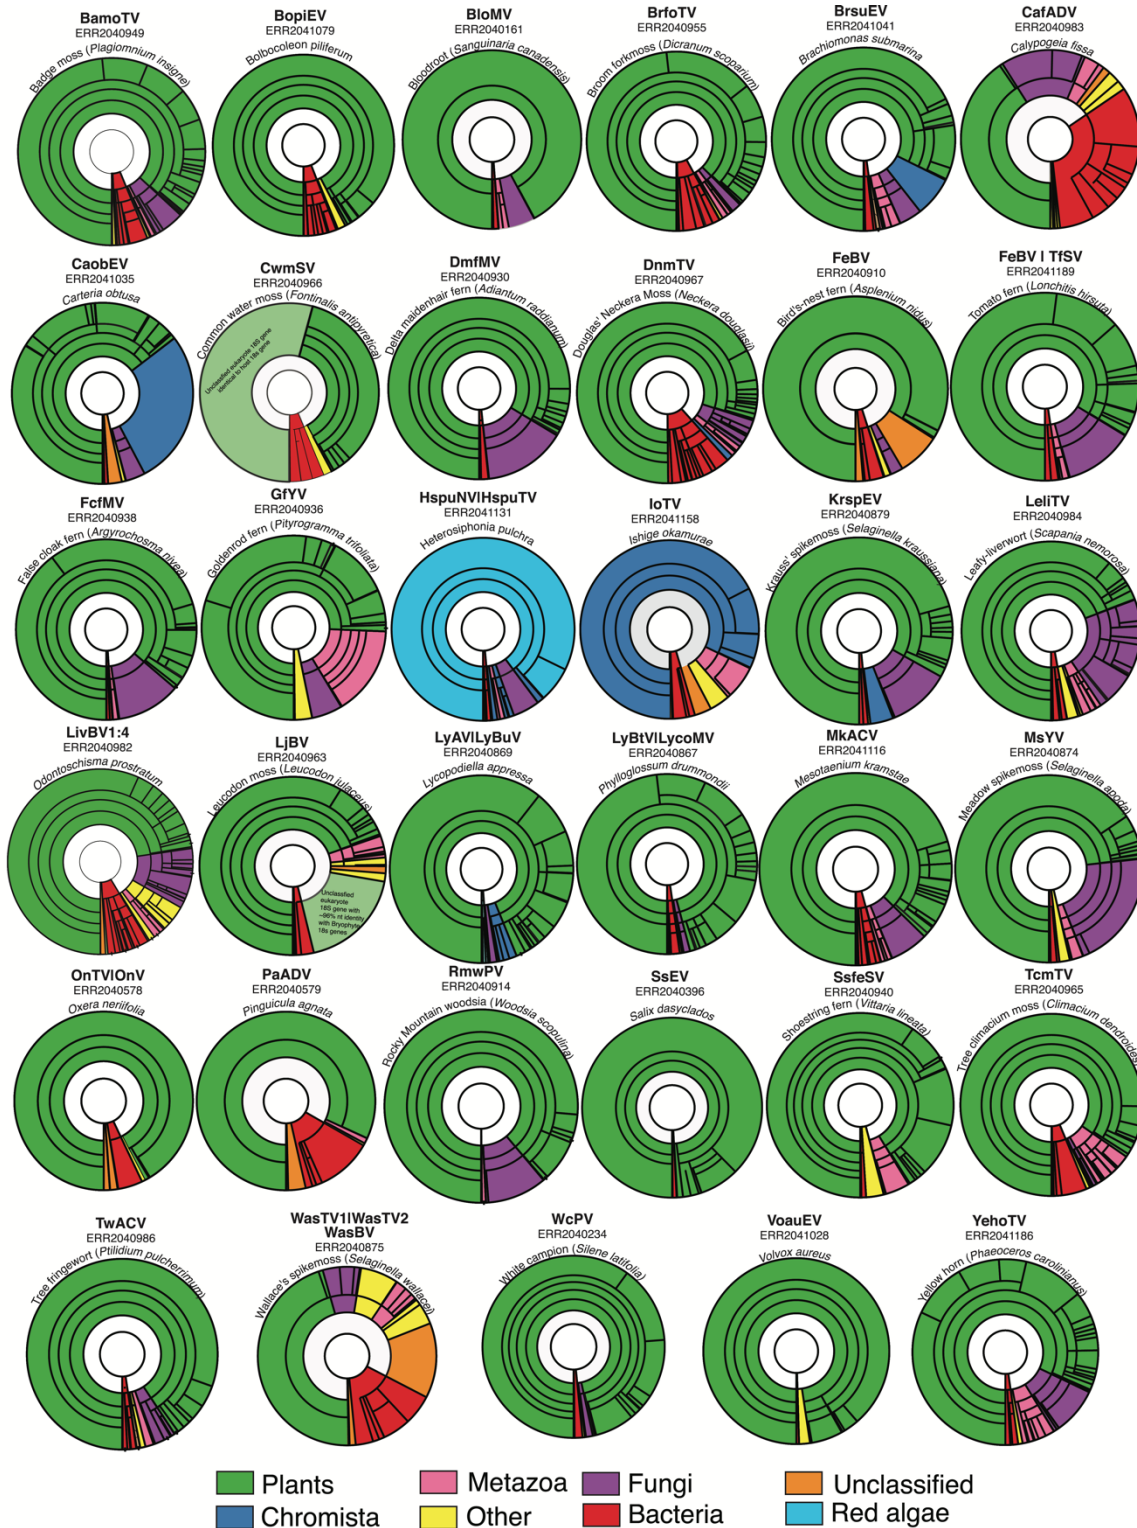

325

326 **Figure 2. Taxonomic assignments of reads in select One Thousand Plant Transcriptomes**

327 **Initiative (1KP) libraries.** Each Krona graph illustrates the relative abundance of taxa in a

328 metatranscriptome at varying taxonomic levels. For clarity, a maximum depth of five taxonomic  
329 levels was chosen for each graph. The library Sequence Read Archive accession number, host  
330 species, and the corresponding virus of interest are annotated above each graph. Segments are  
331 highlighted based upon the species taxonomic grouping (plants = green, Chromista = blue,  
332 unclassified = orange, bacteria = red, metazoa = pink, fungi = purple, red algae = light blue,  
333 other = yellow). Here “plants” encompasses the Viridiplantae. Reads without any match in the nt  
334 database are not shown.

335 The detection of four vertebrate associated viruses across several libraries provided further  
336 evidence of library contamination. Sequences belonging to these viruses - *Influenza A virus* (16  
337 libraries), *Human mastadenovirus C* (30 libraries), *Human immunodeficiency virus* (15 libraries)  
338 and *Parainfluenza virus 5* (3 libraries) – were present at low abundance and showed little  
339 genetic variation between libraries. Notably, chordate-associated reads were only present in  
340 66% of libraries in which these viruses were found. The failure to consistently detect potential  
341 hosts for these viruses suggests contamination during sequencing. The four vertebrate  
342 associated viruses were largely absent in libraries in which novel plant-associated viruses were  
343 discovered, except for the *Larix speciosa*, *Brachiomonas submarina*, *Climacium dendroides*,  
344 *Silene latifolia* and *Oxera neriifolia* transcriptomes.

345 In addition, the 1KP compared all assembled sequences to a reference set of nuclear 18S  
346 ribosomal RNA sequences from the SILVA small subunit rRNA database using BLASTn (31,  
347 68). Where a sample had several alignments to any other plant sequences outside of the  
348 expected source family the sample was described as having “worrisome contamination” (31).  
349 This applied to eleven plant libraries in which novel viruses were identified. Below, we discuss  
350 library contaminates from viewpoint of virus-host associations.

### 351 **3.3 Phylogenetic analysis of identified viruses**



352 To infer phylogenetic relationships between identified viruses, order and family-level  
353 phylogenetic trees were estimated using the highly conserved viral region that comprises the  
354 RdRp. In total, we assembled 104 RdRp contigs that likely represent novel virus species, of  
355 which 41 were considered as unclassified or non-plant associated due to their similarities to  
356 virus groups known to infect non-plant hosts (SI Table 4). Further analysis of these contigs  
357 revealed that they are likely plant-associated.

### 358 **3.3.1 Positive-sense single-stranded RNA ((+)ssRNA) viruses**

#### 359 ***Hepelivirales***

360 ***Benyviridae***. We identified three beny-like sequences that to our knowledge represent the first  
361 benyvirid found in lower plants. The first sequence, tentatively named *Fern benyvirus* (FeBV),  
362 was found in both the bird's-nest fern (*Asplenium nidus*) and tomato fern (*Lonchitis hirsuta*).  
363 Together with *Wheat stripe mosaic virus*, FeBV represents a well-supported clade separate  
364 from the remaining plant benyviruses (Figure 3).

365 The triple gene block (TGB) is a hallmark gene module of the *Benyviridae* among several other  
366 virus families in the class *Alsuviricetes* (69)). In both fern libraries, proteins resembling the TGB  
367 were assembled (Figure 3). The TGB proteins shared ~34% amino acid identity with the TGB  
368 protein of other benyvirids. To our knowledge, this is the first TGB protein found outside of  
369 flowering plants. Phylogenetic analysis placed the TGB1 protein of FeBV basal to the  
370 *Benyviridae* (SI figure 1).

371 Two additional beny-like viruses, named here *Leucodon julaceus associated beny-like virus*  
372 (LjBV) and *Wallace's spikemoss associated beny-like virus* (WasBV) were assembled. LjBV and  
373 WasBV cluster with unclassified algae, invertebrates, fungi and soil-derived viruses forming a  
374 group basal to all plant benyvirids and potentially constitute a novel virus group (Figure 3). LjBV

375 contains a second open reading frame (ORF) with no detectable homology to known sequences  
376 (Figure 3).

377 Due to the phylogenetic placement of LjBV and WasBV close to viruses infecting distant hosts  
378 (e.g., invertebrates and fungi), we investigated the potential of contamination from other  
379 eukaryotes as the source of these viruses. Of note, the Wallace's spikemoss metatranscriptome  
380 contained reads that matched various fungi orders (7% of all reads) as well as those matching  
381 the plant-parasitic oomycete *Albugo laibachii* (7%) which makes inferring virus-host  
382 relationships challenging (Figure 2). Reads belonging to various fungi species accounted for  
383 10% of the bird's-nest fern transcriptome and 12% of the tomato fern transcriptome (Figure 2).  
384 Despite the presence of fungi-associated reads, the phylogenetic position of FeBV suggests  
385 that FeBV is likely plant-associated (Figure 3). No concerning contaminants were detected in  
386 the *Leucodon julaceus* transcriptome.

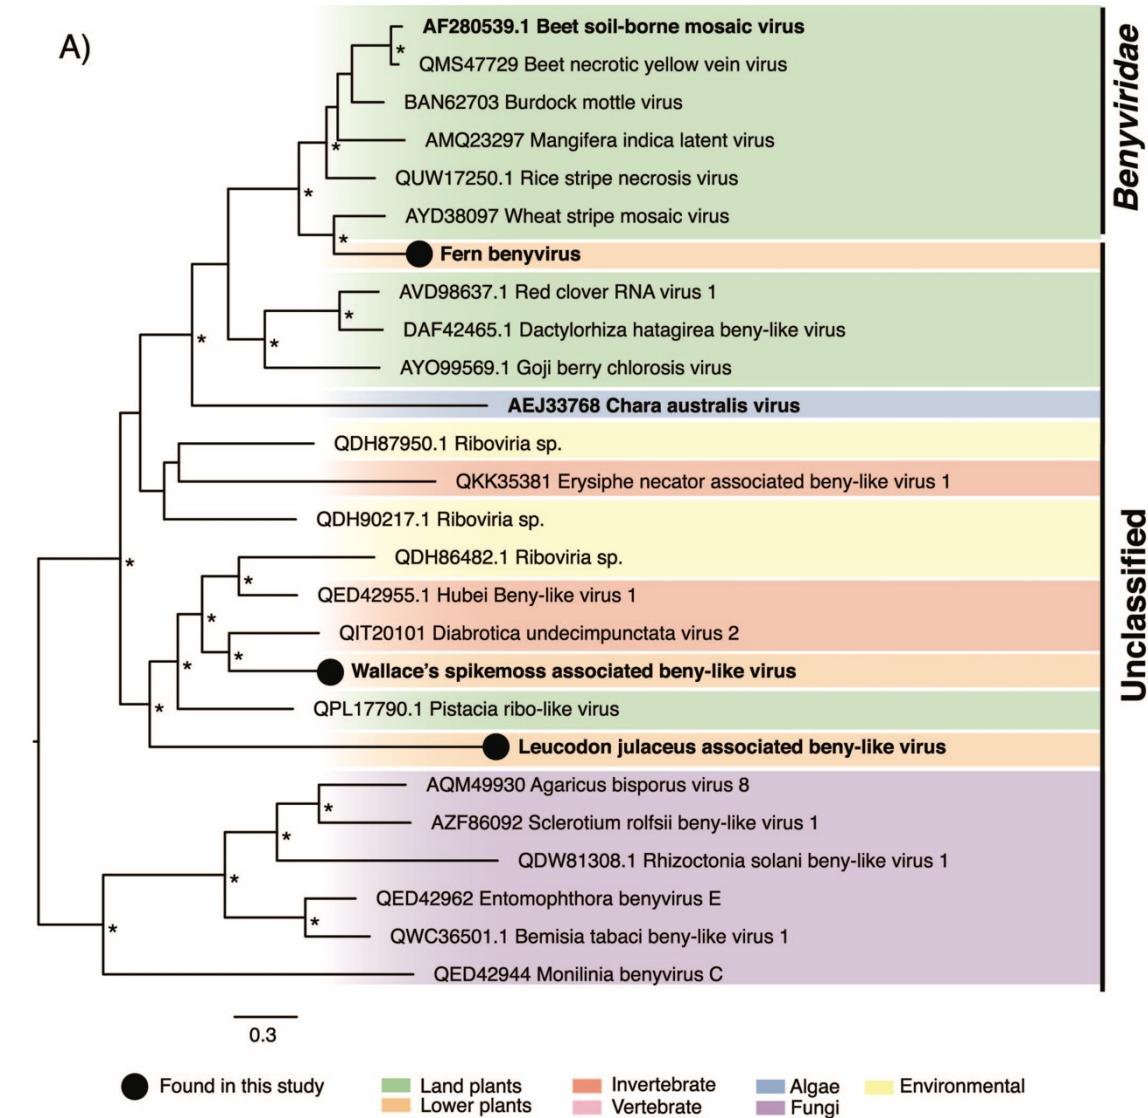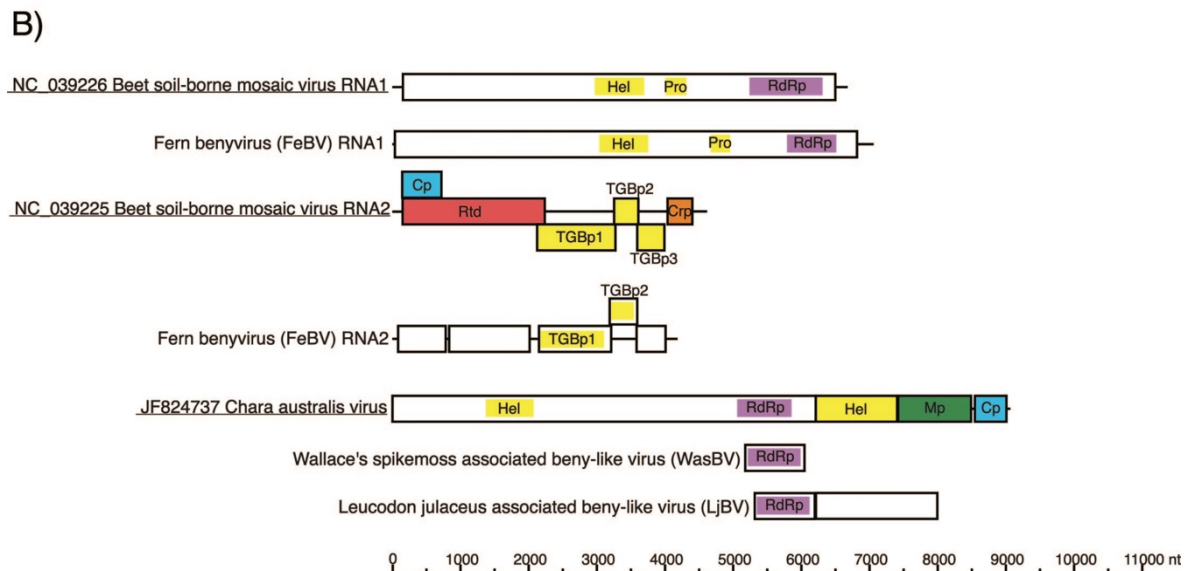



388 **Figure 3.** (A) Phylogenetic relationships of the beny-like viruses identified in this study. ML  
389 phylogenetic tree based on the RNA-1 replicase protein shows the topological position of virus-  
390 like sequences discovered in this study (black circles) in the context of their closest relatives.  
391 Branches are highlighted to represent host clade (land plants = green, lower plants = orange,  
392 invertebrate = red, vertebrate = pink, algae = blue, fungi = purple, yellow = environmental,  
393 Chromista = light blue, red algae = dark green). Here “Land plants” encompasses both  
394 angiosperms and gymnosperms while “Lower plants” includes the bryophytes, lycophytes, and  
395 ferns. All branches are scaled to the number of amino acid substitutions per site and trees were  
396 mid-point rooted for clarity only. An asterisk indicates node support of >70% bootstrap support.  
397 Tip labels are bolded when the genome structure is shown on the right. (B) Genomic  
398 organization of the beny-like virus sequences identified in this study and representative species  
399 used in the phylogeny. Beet soil-borne mosaic virus RNA three and four are not pictured here.  
400 The data underlying this figure and definitions of acronyms used are presented in SI Table 5.

#### 401 ***Tymovirales***

402 ***Betaflexiviridae.*** We identified 18 virus sequences that fell within the order *Tymovirales*. Four  
403 virus transcripts were associated with the *Betaflexiviridae*. The first, named *Sea beet*  
404 *betaflexivirus* (SbBV) clusters with *Agapanthus virus A*, an unclassified betaflexivirus (Figure 4).  
405 The remaining sequences denoted *Iranian poppy betaflexivirus* (IpBV), *Linum macraei*  
406 *betaflexivirus* (LimBV) and *Lycopod associated betaflexivirus* (LyBtV) resemble capilloviruses.  
407 Notably, LyBtV may extend the known host range of the *Betaflexiviridae* from angiosperms to  
408 lower plants. All sequences phylogenetically cluster with known capilloviruses and potentially  
409 represent novel virus species (Figure 4). The *Phylloglossum drummondii* library in which LyBtV  
410 was assembled had contamination from lycopod and dicot species (Figure 2). As the majority of

411 plant-associated reads were assigned to lycophytes (50%), LyBtV has been tentatively assigned  
412 to this group.



414 **Figure 4.** Left: Phylogenetic relationships of the viruses within the order *Tymovirales*. ML  
415 phylogenetic tree based on the replication protein shows the topological position of virus-like  
416 sequences discovered in this study (black circles) in the context of their closest relatives. See  
417 Figure 3 for the colour scheme. All branches are scaled to the number of amino acid  
418 substitutions per site and trees were mid-point rooted for clarity only. An asterisk indicates node  
419 support of >70% bootstrap support. Tip labels are bolded when the genome structure is shown  
420 on the right. Right: Genomic organization of the virus sequences identified in this study and  
421 representative species used in the phylogeny.

422 ***Tymoviridae*.** We identified 12 virus-like sequences that clustered within the *Tymoviridae* and  
423 related viruses. *Ishige okamurae associated tymo-like virus* (IoTV) was detected in the brown  
424 alga *Ishige okamurae* and likely represents the first virus in the order *Tymovirales* from brown  
425 algae. IoTV, along with ten sequences assembled from hornworts, liverworts and bryophytes  
426 grouped with tymo-like viruses from fungus and environmental samples (Figure 4). It is  
427 uncertain whether the true hosts of the novel tymo-like viruses discovered here are plants.  
428 Fungi contaminants were detected across these libraries but varied in abundance (range 1%-  
429 21%, mean = 6%). Despite their clustering with mycotymoviruses, *Broom forkmoss associated*  
430 *tymo-like virus* (BrfoTV) and *Tree climacium moss associated tymo-like virus* (TcmTV) were  
431 assembled from libraries with ~1% fungal reads, highlighting the inherent difficulties in host-  
432 virus assignment. Importantly, <1% of reads in *Ishige okamurae* transcriptome belonged to  
433 species of fungi (Figure 2).

434 We assembled two tymo-like virus sequences denoted *Oxera neriifolia tymo-like virus* (OnTV)  
435 and *Bloodroot marafivirus* (BloMV). BloMV and OnTV grouped with the unclassified *Glehnia*  
436 *littoralis marafivirus* (Figure 4). Marafiviruses and tymoviruses are commonly distinguished from  
437 each other based upon a highly conserved 16 nucleotide (nt) sequence known as the “tymobox”

438 [GAGUCUGAAUUGCUUC] in tymoviruses and the “marafibox” [CA(G/A)GGUGAAUUGCUUC]  
439 in marafiviruses (70, 71). While these two novel viruses cluster together phylogenetically, they  
440 differ in terms of genome structure and motifs. A “marafibox” like sequence appears to be  
441 present in BloMV (CAACGCGAAUUGCUUU) (5606-5621 nt) albeit differing by several  
442 residues. This finding, combined with the BloMV genome likely consisting of a single large ORF,  
443 supports the assignment of BloMV as a *Marafivirus*. OnTV, like members of the *Tymovirus*  
444 genera, contains both a second ORF – likely encoding a coat protein (CP) – and a tymobox  
445 (1493-1508 nt) (Figure 4). Phylogenetic analysis of the coat protein sequence places OnTV and  
446 BloMV in a clade with macula- and marafi-like viruses (SI Figure 1).

447 ***Deltaflexiviridae***. We assembled two sequences that share similarities to members of the  
448 mycotymovirus family, *Deltaflexiviridae*. The first sequence was detected in the liverwort  
449 *Calypogeia fissa*, tentatively named *Calypogeia fissa associated deltaflexivirus* (CafADV) and  
450 appeared distantly related to delta- and gammaflexiviruses. A second related partial sequence,  
451 named here *Pinguicula agnata virus* (PaV), shared 32% amino acid identity with mycoflexivirus,  
452 *Botrytis virus F*. In a phylogenetic analysis with members of the *Tymovirales*, CafADV and  
453 PaAGV are placed with the deltaflexivirids (Figure 4).

454 It is unclear whether the source of these virus sequences is from plants or contamination from  
455 other eukaryotes. The *C. fissa* library contained numerous contaminants including algae, fungi  
456 and bacteria representing 1%, 15% and 33% of total reads respectively, which make discerning  
457 the host association for CafAV challenging (Figure 2). Interestingly, no fungi-associated reads  
458 were found in the *P. agnata* library suggesting a potential plant origin (Figure 2).

459 ***Picornavirales***

460 ***Secoviridae***. We identified four sequences that shared similarities to members of the  
461 *Secoviridae* denoted *Common water moss secovirus* (CwmSV), *Salix dasyclados secovirus*  
462 (*SadSV*), *Tomato fern secovirus* (TfSV) and *Shostring fern secovirus* (SfSV). CwmSV, TfSV and  
463 SfSV cluster within the nepoviruses and likely represented the first seco-like virus detected in  
464 the bryophytes and ferns (Figure 5).



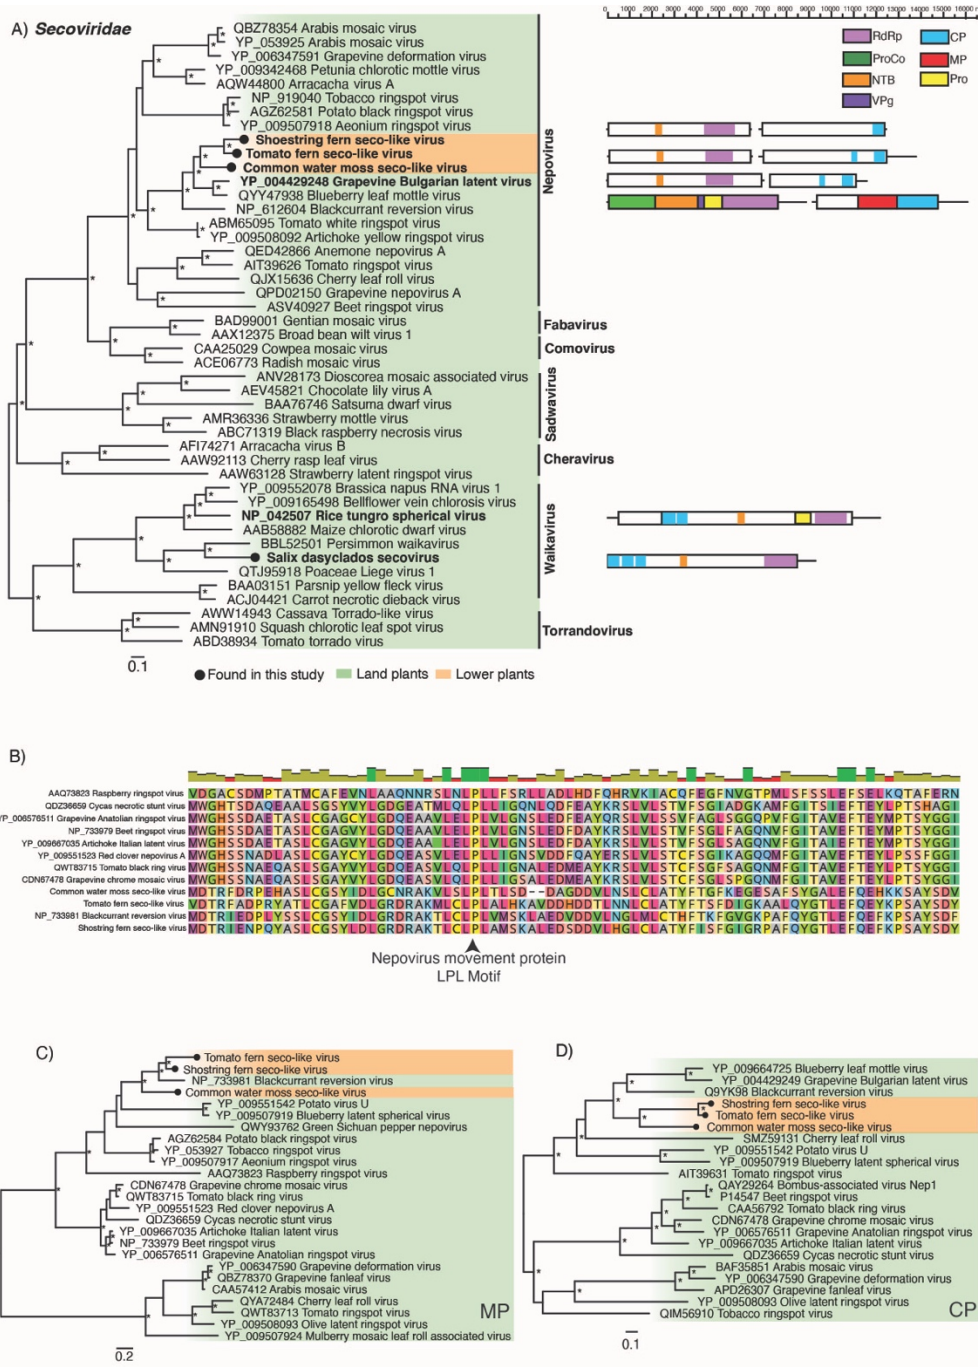

465

466 **Figure 5.** (A) Left: Phylogenetic relationships of the viruses identified within the virus family  
 467 *Secoviridae*. ML phylogenetic trees based on the Pro-pol region show the topological position of  
 468 virus-like sequences discovered in this study (black circles) in the context of their closest  
 469 relatives. Right: Genomic organization of the seco-like sequences identified in this study and

470 representative species used in the phylogeny. (B) Multiple amino acid sequence alignment of  
471 the 30K movement protein “LPL” motifs which are highly conserved throughout the nepoviruses.  
472 (C) Phylogenetic relationships of the Nepovirus 30K movement proteins. D) Phylogenetic  
473 relationships of the Nepovirus coat proteins. For all trees, branches are scaled to the number of  
474 amino acid substitutions per site and trees were mid-point rooted for clarity only. An asterisk  
475 indicates node support of >70% bootstrap support. Tip labels are bolded when the genome  
476 structure is shown on the right. See Figure 3 for the colour scheme. Viruses discovered in this  
477 study are signified using a black circle on the tree tip.

478 A putative RNA2 ORF was assembled for the three nepovirus-like sequences each containing a  
479 complete CP (Figure 5). The CPs fall within the nepovirus subgroup C (Figure 5D). While a  
480 movement protein (MP) domain was not formally detected, we predict that the region upstream  
481 of the CP contains a putative movement-like protein. For CwmSV, this region (amino acid  
482 position 312-883) displayed sequence homology to the MP of *Blackcurrant reversion virus* (E-  
483 value: 5.42e-86, amino acid identity: 46%). Both TfsV and SfSV displayed similar levels of  
484 homology in this region. We detected the LPL motif which is commonly found in nepovirus MPs  
485 in all three viruses (Figure 5B). Phylogenetic analysis of the putative MPs placed these viruses  
486 with *Blackcurrant reversion virus* in the genera Nepovirus (Figure 5C).

487 We found little evidence that these viruses were detected due to contamination by land plants or  
488 other eukaryotes. The *F. antipyretica* transcriptome was composed of reads closely related to a  
489 feather moss belonging to the order Hypnales to which *F. antipyretica* is also found.

490 Furthermore, a large proportion of reads were assigned to an uncultured eukaryote 18S rRNA  
491 gene (54%) (HG421124.1) that was identical to the *F. antipyretica* 18S rRNA (AF023714.1)  
492 among other bryophyte 18S rRNA genes in a blastn search (e-value = 2e-102, nucleotide  
493 identity = 100%) (Figure 2). Fungi represented 12% of reads in the *L. hirsute* transcriptome.



494 Despite this, it is unlikely that TfSV is fungi-associated as no fungal contamination was detected  
495 in the *Vittaria lineata* transcriptome in which the closely related SfSV sequence (amino acid  
496 identity: 78%) was assembled (Figure 2).

#### 497 ***Lenarviricota***

498 ***Mitoviridae***. We identified six virus sequences that cluster within the *Mitoviridae* - denoted  
499 *Chinese swamp cypress mitovirus* (CscMV), *Asian bayberry mitovirus* (AsbaMV), *False cloak*  
500 *ferns mitovirus* (FcfMV), *Delta maidenhair fern mitovirus* (DmfMV) and *Lycopod associated*  
501 *mitovirus* (LycoMV). The fern (FcfMV and DmfMV) and lycophyte (LycoMV) associated  
502 sequences cluster with the fern *Azolla filiculoides mitovirus 1* and form a sister group to the  
503 plant mitoviruses and non-retroviral endogenous RNA viral elements (NERVEs) (Figure 6) (16).  
504 The gymnosperm associated sequences form a sister all the plant-associated mitoviruses and  
505 NERVEs. KpcMV extends the known host range of plant mitoviruses from ferns to lycophytes.  
506 Another mito-virus sequence was detected in the green alga *Bolbocoleon piliferum*, denoted  
507 *Bolbocoleon piliferum mito-like virus* (BopiMV). BopiMV falls basal to the mitoviruses, distinct  
508 from various unclassified mito-like viruses including the green algae associated *mito-like*  
509 *picolinusvirus* (QOW97241) (Figure 6). All novel sequences show strong conservation of the  
510 motifs characteristic of mitovirus RdRps (SI Figure 2) (72).

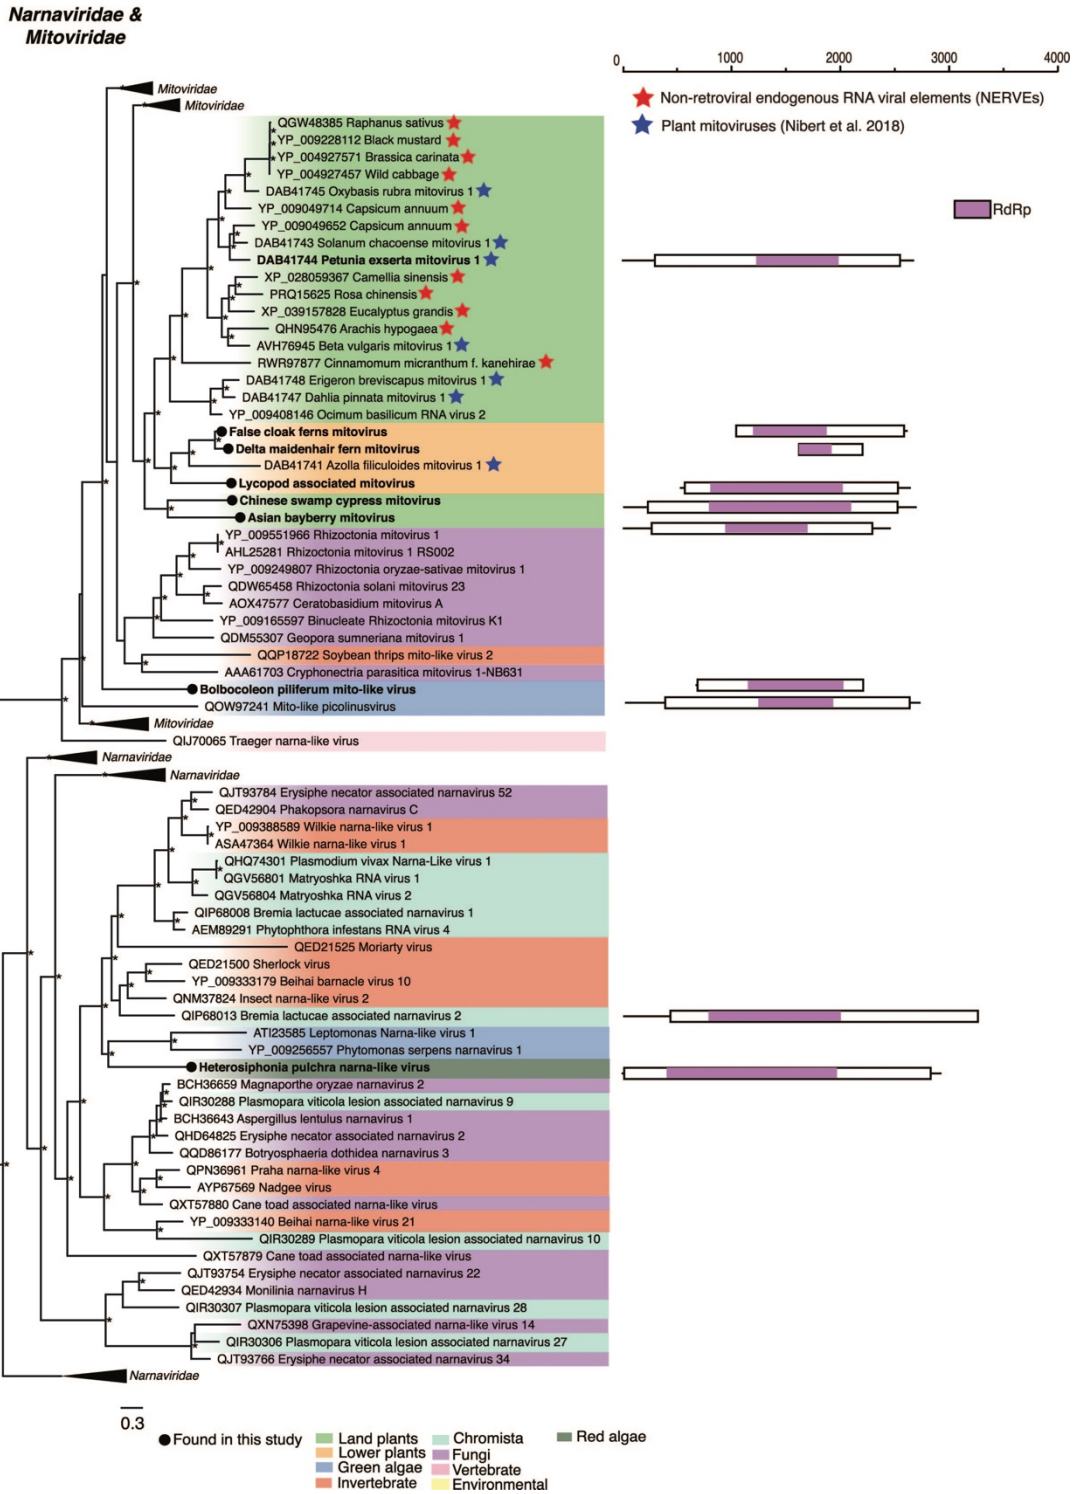

511

512 **Figure 6.** Left: Phylogenetic relationships of the viruses within the virus families *Narnaviridae*  
 513 and *Mitoviridae*. ML phylogenetic trees based on the replication protein show the topological  
 514 position of virus-like sequences discovered in this study (black circles) in the context of their

515 closest relatives. See Figure 3 for the colour scheme. Blue stars signify mitovirus sequences  
516 identified in (16). Red stars signify non-retroviral endogenous RNA viral elements (NERVEs). All  
517 branches are scaled to the number of amino acid substitutions per site and trees were mid-point  
518 rooted for clarity only. An asterisk indicates node support of >70% bootstrap support. Tip labels  
519 are bolded when the genome structure is shown on the right. Right: Genomic organization of the  
520 virus sequences identified in this study and representative species used in the phylogeny.

521 There is little evidence to suggest that these sequences are derived from a non-plant organism.  
522 While the FcfMV and DmfMV libraries were contaminated with fungi, (12% and 15% of reads  
523 respectively) fungi-associated reads were absent in the libraries of all other mitoviruses. As the  
524 codon UGA encodes tryptophan (Trp) in fungal mitochondria this codon assignment is also  
525 present in fungal mitoviruses (73-75). In contrast, the UGA codon in plant mitochondria is a stop  
526 codon and hence absent from plant mitovirus sequences except as a stop codon (16). The  
527 absence of internal UGA codons in these sequences is further evidence that these sequences  
528 are plant-derived (16, 76). Although additional analyses are required, we found no evidence  
529 through searches of the 1KP genome scaffolds and the WGS shotgun database that these  
530 sequences are mitochondrial or nuclear NERVEs. Furthermore, CscMV, AsbaMV and LycoMV  
531 contain complete RdRps and their UTRs share similarities in length and identity with plant  
532 mitoviruses.

533 ***Narnaviridae*** A partial narna-like virus sequence was identified in the red alga *Heterosiphonia*  
534 *pulchra* denoted *Heterosiphonia pulchra* narna-like virus (HspuNV). HspuNV clusters with  
535 unclassified trypanosomatid associated viruses. While ~5% of reads in this library were  
536 associated with fungi the phylogenetic position of this virus suggests that it is not derived from  
537 fungi (Figure 2, Figure 6).

538 ***Tolivirales***

539 ***Tombusviridae***. An alphacarmo-like virus tentatively named *Ihi tombusvirus* (IhiTV) was  
540 identified in an Ihi (*Portulaca molokiniensis*) sample. IhiTV is phylogenetically positioned within  
541 the alphacarmoviruses (SI Figure 3).

#### 542 ***Patatavirales***

543 ***Potyviridae***. We identified three virus-like sequences that clustered with plant viruses in the  
544 family *Potyviridae* – *Traubia modesta potyvirus* (TramPV), *Common milkweed potyvirus*  
545 (*ComPV*) and *Salt wort potyvirus* (*SawPV*). TramPV and ComPV shared 87% amino acid  
546 identity and may therefore represent a single virus species. The potyvirus-like sequences  
547 discovered all group with known potyviruses in a phylogenetic analysis of the Nib gene (SI  
548 Figure 3).

#### 549 ***Martellivirales***

550 ***Endornaviridae***. Six alphaendorna-like virus sequences were detected in the four green algae  
551 species and one lycophyte. The green algae and lycophyte associated alphaendorna-like  
552 viruses termed *Bolbocoleon piliferum endorna-like virus* (BopiEV), *Volvox aureus endorna-like*  
553 *virus* (VoauEV), *Carteria obtusa associated endorna-like virus* (CaobEV), *Brachiomonas*  
554 *submarina associated endorna-like virus* (BrsuEV), *Staurastrum sebaldi endornavirus* (SsEV)  
555 and *Krauss' spikemoss associated endorna-like virus* (KrspEV) fall across the  
556 alphaendornavirus phylogeny and predominately cluster with algae and fungi associated viruses  
557 (Figure 7). There was little evidence of algae (non-host) or fungi contamination in the *S. sebaldi*,  
558 *B. piliferum* and *V. aureus* transcriptomes with <1% of all reads associated with these groups  
559 (Figure 2). Non-green algae contaminants were present in the *C. obtus* (28%), *B. submarina*  
560 (7%) and *S. kraussiana* (4%) transcriptomes where fungi also appeared as a notable  
561 contaminate representing 11% of all reads (Figure 2). To our knowledge, these sequences

562 represent the first endornavirus associated with charophytes, chlorophytes and lycophytes  
563 although further work is needed to confirm the virus-host associations.

564 **Unclassified.** We identified a virus-like sequence in an *Oxera neriifolia* library, termed *Oxera*  
565 *neriifolia associated virus*. The sequence, 10,214 nt in length contained four ORFs. The first  
566 ORF (7,536 nt) comprised of a viral methyltransferase, helicase, and RNA polymerase while the  
567 third ORF (513 nt) most closely resembled a CP. ORF one and ORF three shared the greatest  
568 sequence similarity with *Culex pipiens associated Tunisia virus* (32% amino acid identity). The  
569 second and fourth ORF share no homology to known viruses. The genome organization of OnV  
570 is distinct from the other related plant virus families (Figure 7). OnV forms a distinct and well-  
571 supported outgroup to the *Closteroviridae*, *Bromoviridae* and *Mayoviridae* families. As such, OnV  
572 may potentially constitute a new virus family (Figure 7). We found little evidence that OnV was  
573 detected due to contamination by other eukaryotes (Figure 2).

a) **Endornaviridae**

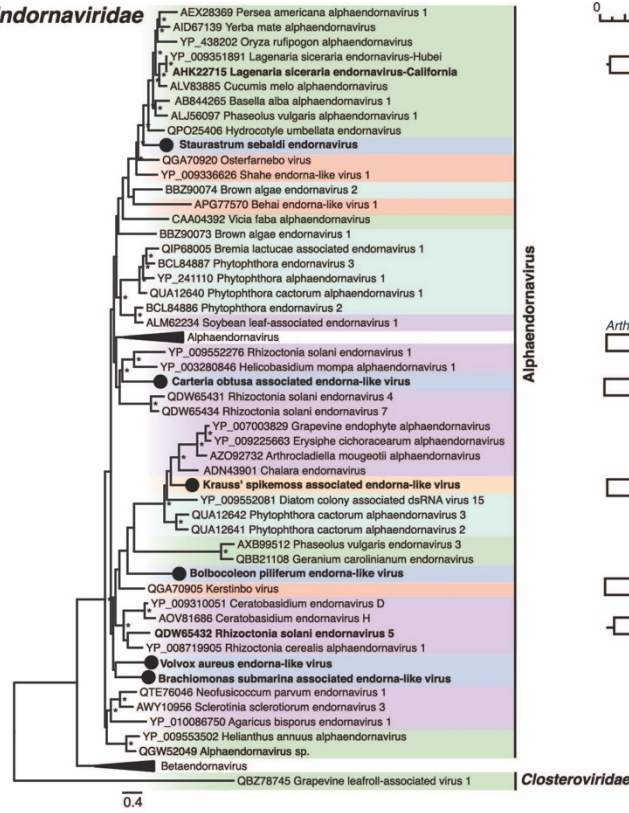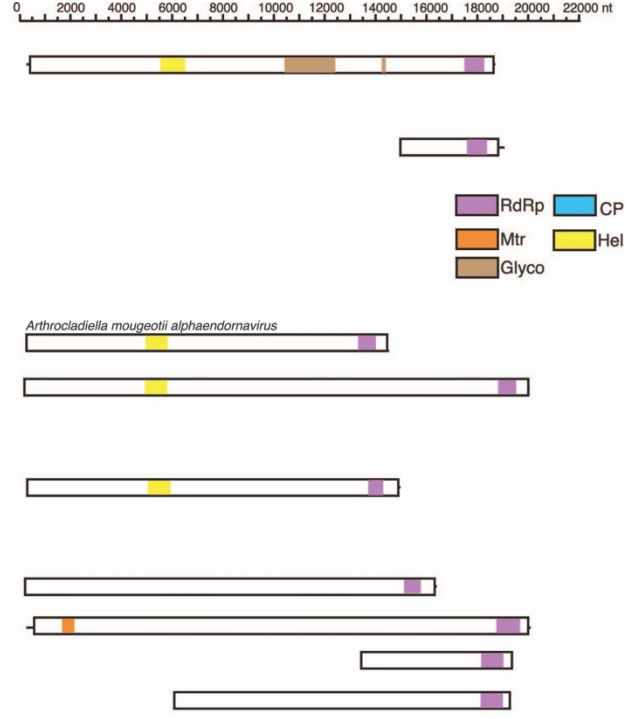

b) ssRNA viruses

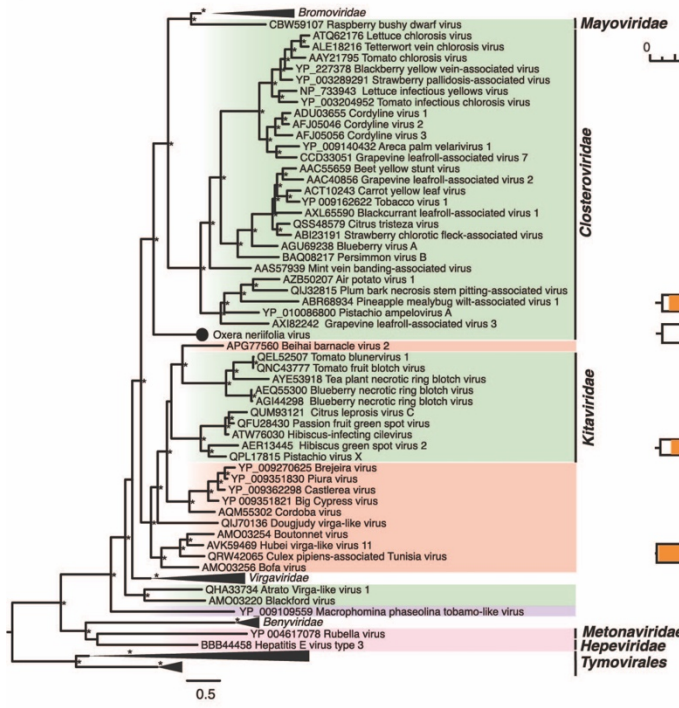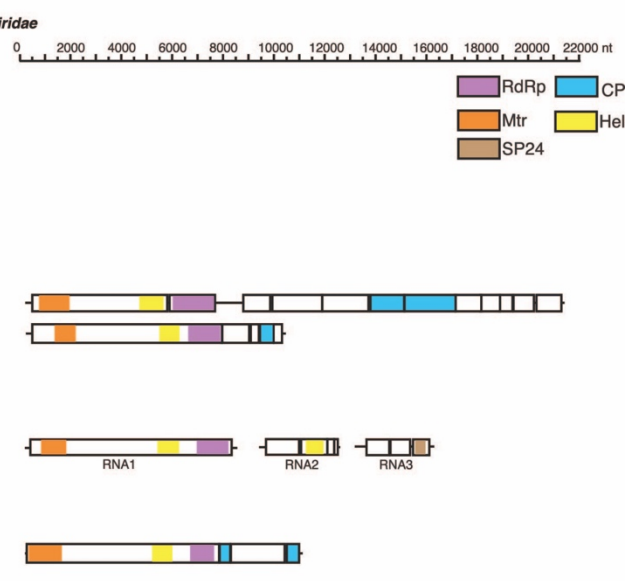

- Found in this study
- Land plants
- Lower plants
- Green algae
- Invertebrate
- Chromista
- Fungi
- Vertebrate
- Environmental



575 **Figure 7.** Left: Phylogenetic relationships of the (A) endorna-like and (B) unclassified (+)ssRNA  
576 virus identified in this study. ML phylogenetic trees based on the replication protein show the  
577 topological position of virus-like sequences discovered in this study in the context of those  
578 obtained previously. Right: Genomic organization of the (A) endorna-like and (B) unclassified  
579 ssRNA virus sequence identified in this study and representative species used in the phylogeny.  
580 For all trees, branches are scaled to the number of amino acid substitutions per site and trees  
581 were mid-point rooted for clarity only. An asterisk indicates node support of >70% bootstrap  
582 support. Tip labels are bolded when the genome structure is shown on the right. See Figure 3  
583 for the colour scheme. Viruses discovered in this study are signified using a black circle on the  
584 tree tip.

### 585 **3.3.2 Negative-sense single-stranded RNA ((-)ssRNA) viruses**

#### 586 ***Bunyavirales***

587 ***Phenuiviridae.*** A phenui-like virus sequence termed *Brown algae phenui-like virus* (BralPV)  
588 was recovered from a *Sargassum thunbergii* transcriptome. The partial L segment clusters with  
589 the unclassified plant and fungi viruses (Figure 8). No additional phenui-like virus segments  
590 were recovered. There were no concerning contaminants were detected in the *S. thunbergii*  
591 transcriptome (Figure 2).

592 ***Viridibunyaviridae.*** We identified 16 bunya-like virus sequences from eight liverwort, moss  
593 and lycophyte libraries. Three libraries contained multiple distinct putative complete and partial  
594 viruses. The overall pairwise nucleotide identity was <70% between each sequence (Figure 8).  
595 As such we consider each a different bunya-like viruses. These sequences group together to  
596 form a novel clade of unclassified bunya-like viruses distantly related to oomycete, fungi, and  
597 invertebrate viruses (Figure 8). Bunyaviruses typically comprise three segments (L, M, and S),

598 although only the L segment was recovered for these sequences. These sequences represent  
599 the first plant-associated viruses that cluster near the unofficially named *Deltamycobunyaviridae*  
600 (77) (Figure 8). As the complete coding sequences of the viruses discovered share <30% amino  
601 acid identity to the nearest relatives in the *Deltamycobunyaviridae*, they may constitute a new  
602 virus family. We tentatively name this virus family the *Viridisbunyaviridae*, (*Viridis* meaning  
603 green, while bunya is derived from the virus order *Bunyavirales* in which this clade falls within).  
604 There was no evidence suggesting that these sequences originated from non-plant  
605 contaminants. Host assignment was unclear for *Lycopod associated bunyavirus* and *Liverwort*  
606 *associated bunyavirus 1:4* as reads belonging to several lycophyte and liverwort species,  
607 respectively, were found in the source transcriptomes (Figure 2).



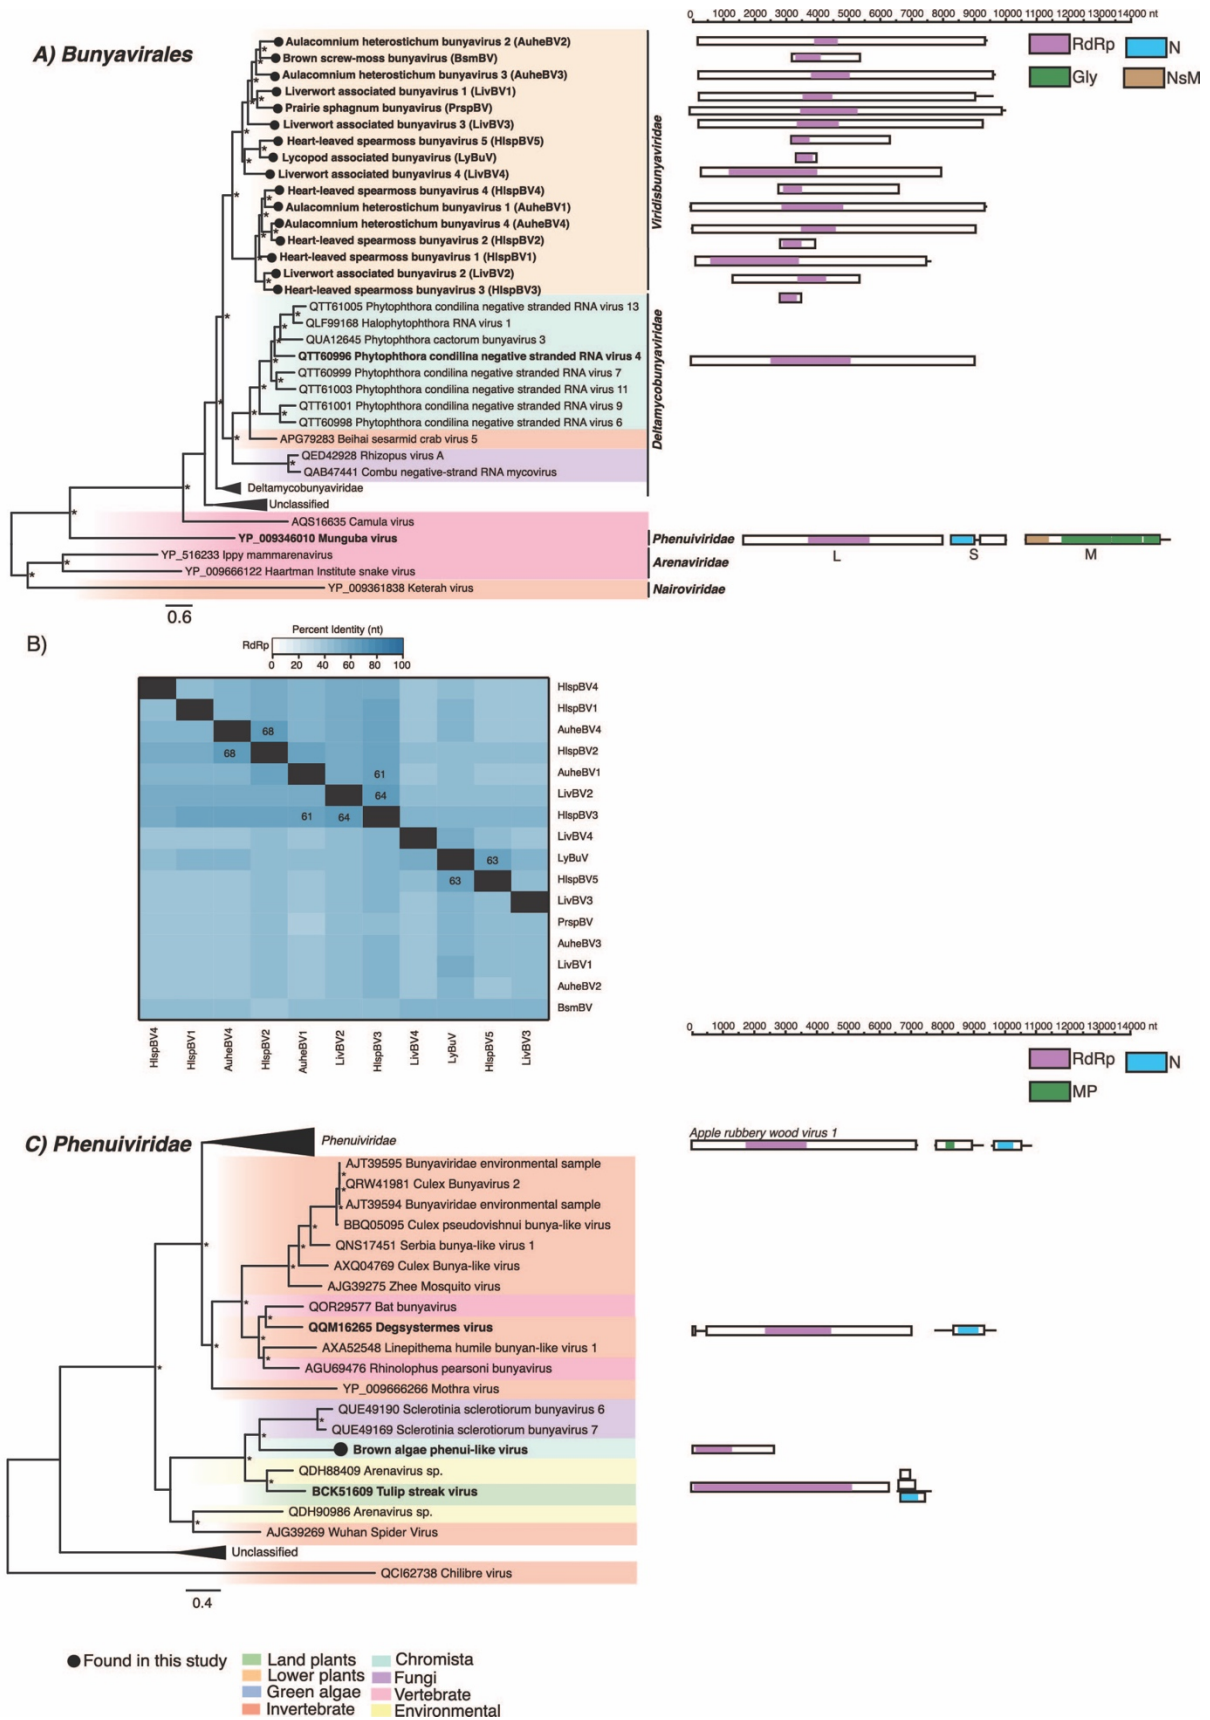

609 **Figure 8.** Phylogenetic relationships of the viruses (A) Left: A phylogeny depicting a novel clade  
610 of viruses related to the *Deltamycobunyaviridae* in the context of the *Bunyavirales*. Right:  
611 Genomic organization of the virus sequences identified in this study and representative species  
612 used in the phylogeny (B) Percent identity matrix of the novel bunya-like viruses. Identity scores  
613 are calculated from an alignment of the RdRp protein coding sequence. For clarity, the 100%  
614 identity along the diagonal has been removed. Where sequence identity is  $\geq 60\%$  the value is  
615 shown. (C) Left: A phylogeny depicting the phenui-like virus identified in this study in the context  
616 of the *Phenuiviridae*. Right: Genomic organization of the virus sequences identified in this study  
617 and representative species used in the phylogeny. For all trees, branches are scaled to the  
618 number of amino acid substitutions per site and trees were mid-point rooted for clarity only. An  
619 asterisk indicates node support of  $>70\%$  bootstrap support. Tip labels are bolded when the  
620 genome structure is shown on the right. See Figure 3 for the colour scheme. Viruses discovered  
621 in this study are signified using a black circle on the tree tip.

## 622 ***Mononegavirales***

623 ***Rhabdoviridae.*** We identified seven sequences that clustered with plant viruses in the family  
624 *Rhabdoviridae* denoted *Canadian violet rhabdovirus 1* (CvRV1), *Canadian violet rhabdovirus 2*  
625 (CvRV2), *Common ivy rhabdovirus* (CoiRV) and *Indian pipe rhabdovirus* (InpRV), *Tree fern*  
626 *varicosa-like virus* (TfVV), *Monoclea gottschei varicosa-like virus* (MgVV) and *Bug moss*  
627 *associated rhabdo-like virus* (BmRV). Notably, TfVV and MgVV expand the host range of the  
628 rhabdoviruses from angiosperms and gymnosperm to ferns and liverworts. RNA2 segments  
629 were recovered for both viruses, TfVV RNA2 contained five genes while MgVV contained four  
630 (Figure 9C). Two partial segments sharing similarities to the nucleocapsid (N) of *Black grass*  
631 *varicosavirus-like virus* (YP\_009130620.1) were found in the Indian pipe library and share 50%

632 amino acid identity. All sequences likely represent novel species within known plant infecting  
633 genera (Figure 9C).

634 BmRV is a partial sequence (693 nt) most closely related to the unclassified *Hubei rhabdo-like*  
635 *virus 2* (44% amino acid identity). Further evidence is needed to confirm BmRV as the first moss  
636 rhabdovirus, but the relatively low proportion of contaminants in this library (3% algae and 3%  
637 fungi) suggests that this virus is plant-associated (Figure 2). While 53% of reads in the MgVV  
638 library were fungi associated the phylogenetic position of MgVV suggests it is derived from  
639 plants (Figure 2, Figure 9C).

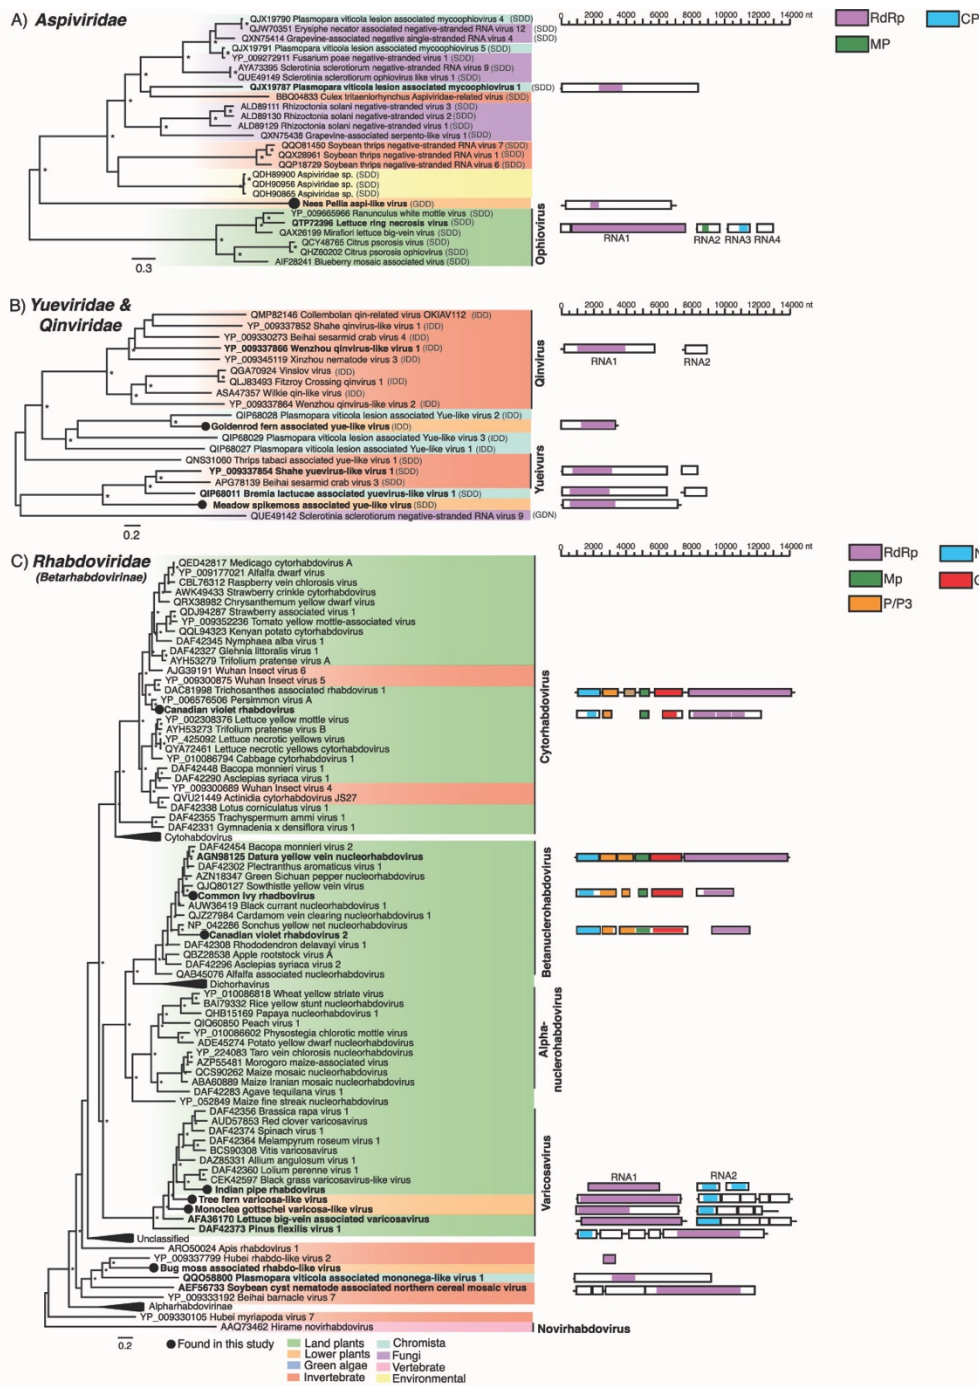

640

641 **Figure 9.** Left: Phylogenetic relationships of the viruses within the families, (A) *Aspiviridae*, (B)

642 *Yue-* and *Qinviridae* and (C) *Rhabdoviridae*. Right: Genomic organization of the virus

643 sequences identified in this study and representative species used in the phylogeny. For all

644 trees, branches are scaled to the number of amino acid substitutions per site and trees were

645 mid-point rooted for clarity only. An asterisk indicates node support of >70% bootstrap support.  
646 Tip labels are bolded when the genome structure is shown on the right. See Figure 3 for the  
647 colour scheme. Viruses discovered in this study are signified using a black circle on the tree tip.  
648 For trees (A) and (B), the RdRp motif C trimer of each sequence is shown in brackets at the end  
649 of the tip label.

## 650 ***Serpentovirales***

651 ***Aspiviridae***. We identified an aspi-like sequence termed *Nees' Pellia aspi-like virus* (NpAV). A  
652 complete RNA1 segment (6989 nt) was assembled, although no other segments were  
653 recovered (Figure 9A). NpAV most closely resembles *Rhizoctonia solani negative-stranded*  
654 *virus 3* (amino acid identity: 22%) and falls basal to all the unclassified aspi-like viruses  
655 including those found in fungi, invertebrates, and oomycetes. NpAV is the first aspi-like virus  
656 identified in plants outside of the angiosperms and may constitute a novel virus group (Figure  
657 9A). Notably, unlike the other aspiviruses that possess a SDD sequence in motif C of the RdRp  
658 – a known signature for segmented negative-stranded RNA viruses – NpAV has a GDD  
659 sequence (Figure 9A).

## 660 ***Goujianvirales***

661 ***Yueviridae***. An yue-like virus sequence termed *Meadow spikemoss associated yue-like virus*  
662 (MsYV) was found in the lycophyte *Selaginella apoda* and most closely resembles algae  
663 associated *Bremia lactucae associated yuevirus-like virus 1* (amino acid identity: 26%).  
664 Phylogenetic analysis supports the assignment of MsYV as the first plant yuevirus (Figure 9B)  
665 A second partial yue-like virus sequence was detected in a *Pityrogramma trifoliata* library and  
666 termed *Goldenrod fern associated yue-like virus* (GfYV). GfYV falls with a group of oomycete  
667 associated viruses. Consistent with the qin-like viruses, GfYV has an IDD (Ile-Asp-Asp)

668 sequence motif instead of the common GDD (Gly-Asp-Asp) in the catalytic core of its RdRp,  
669 while MsYV contains SDD (Ser-Asp-Asp) in the same manner as many yue-like viruses (Figure  
670 9B). The libraries from which GfYV and MsYV were assembled are contaminated with fungal  
671 reads (5% and 21%, respectively) as such host assignment is made with caution (Figure 2).  
672 Reads belonging to oomycetes were not found in either library.

### 673 **3.3.3 Double-stranded RNA (dsRNA) viruses**

#### 674 ***Durnavirales***

675 ***Amalgaviridae***. We detected five sequences that cluster with amalga-like viruses. *Lycopod*  
676 *associated amalgavirus* (LycoAV) is a partial RdRp containing a sequence that falls basal to the  
677 *Amalgaviridae* and represents the first amalga-like virus in the lycophytes (Figure 10). Three  
678 amalga-like sequences were discovered in green and red algae transcriptomes and cluster with  
679 *Diatom colony associated dsRNA virus 2* (Figure 10). As noted in the case of *Bryopsis*  
680 *mitochondria-associated dsRNA virus* and several green algae associated viruses (78) when  
681 translated into amino acids using the protozoan mitochondrial code, two overlapping ORFs are  
682 present: the first, encoding a hypothetical protein, while the second, a replicase through a -1  
683 ribosomal frameshift (79). For two of the amalga-like sequences identified in this study –  
684 *Nucleotaenium eifelense virus* (NueiV) and *Rhodella violacea virus* (RhviV) – a similar structure  
685 was observed but we were unable to identify any ribosomal frameshift motifs in either sequence  
686 (Figure 10). Further work is needed to confirm if these sequences should be translated through  
687 the mitochondrial genetic code.

688 A contig containing what appears to be a complete coding sequence (3259 nt) and RdRp motifs  
689 was assembled in the *Woodsia scopulina* transcriptome and tentatively named *Rocky Mountain*  
690 *woodsia associated virus* (RmwPV). The predicted RdRp region (918-1921 nt) of RmwPV



691 shares similarity to both partiti-like viruses (e.g., *Ustilagoidea virens nonsegmented virus 2*,  
692 26% aa identity) and the unclassified *Phytophthora infestans RNA virus 1* (42% aa identity)  
693 which has been shown to likely constitutes a novel virus family (80). The resemblance RmwPV  
694 shares with two seemingly distantly related virus groups suggest its position within the  
695 *Durnavirales* should be treated with caution (Figure 10).

696 The transcriptome in which RmwPV was discovered is contaminated with fungal reads (10%  
697 (Figure 2). If RmwPV was derived from fungal contaminates this could potentially explain the  
698 phylogenetic placement of RmwPV (Figure 10). The *Lycopodiella appressa* transcriptome in  
699 which LycoAV was discovered is contaminated by reads belonging to species across various  
700 land plant groups. Reads belonging to land plants comprised 35% of plant-associated reads  
701 while lycopod associated reads comprised 65% (Figure 2).



**Durnavirales**

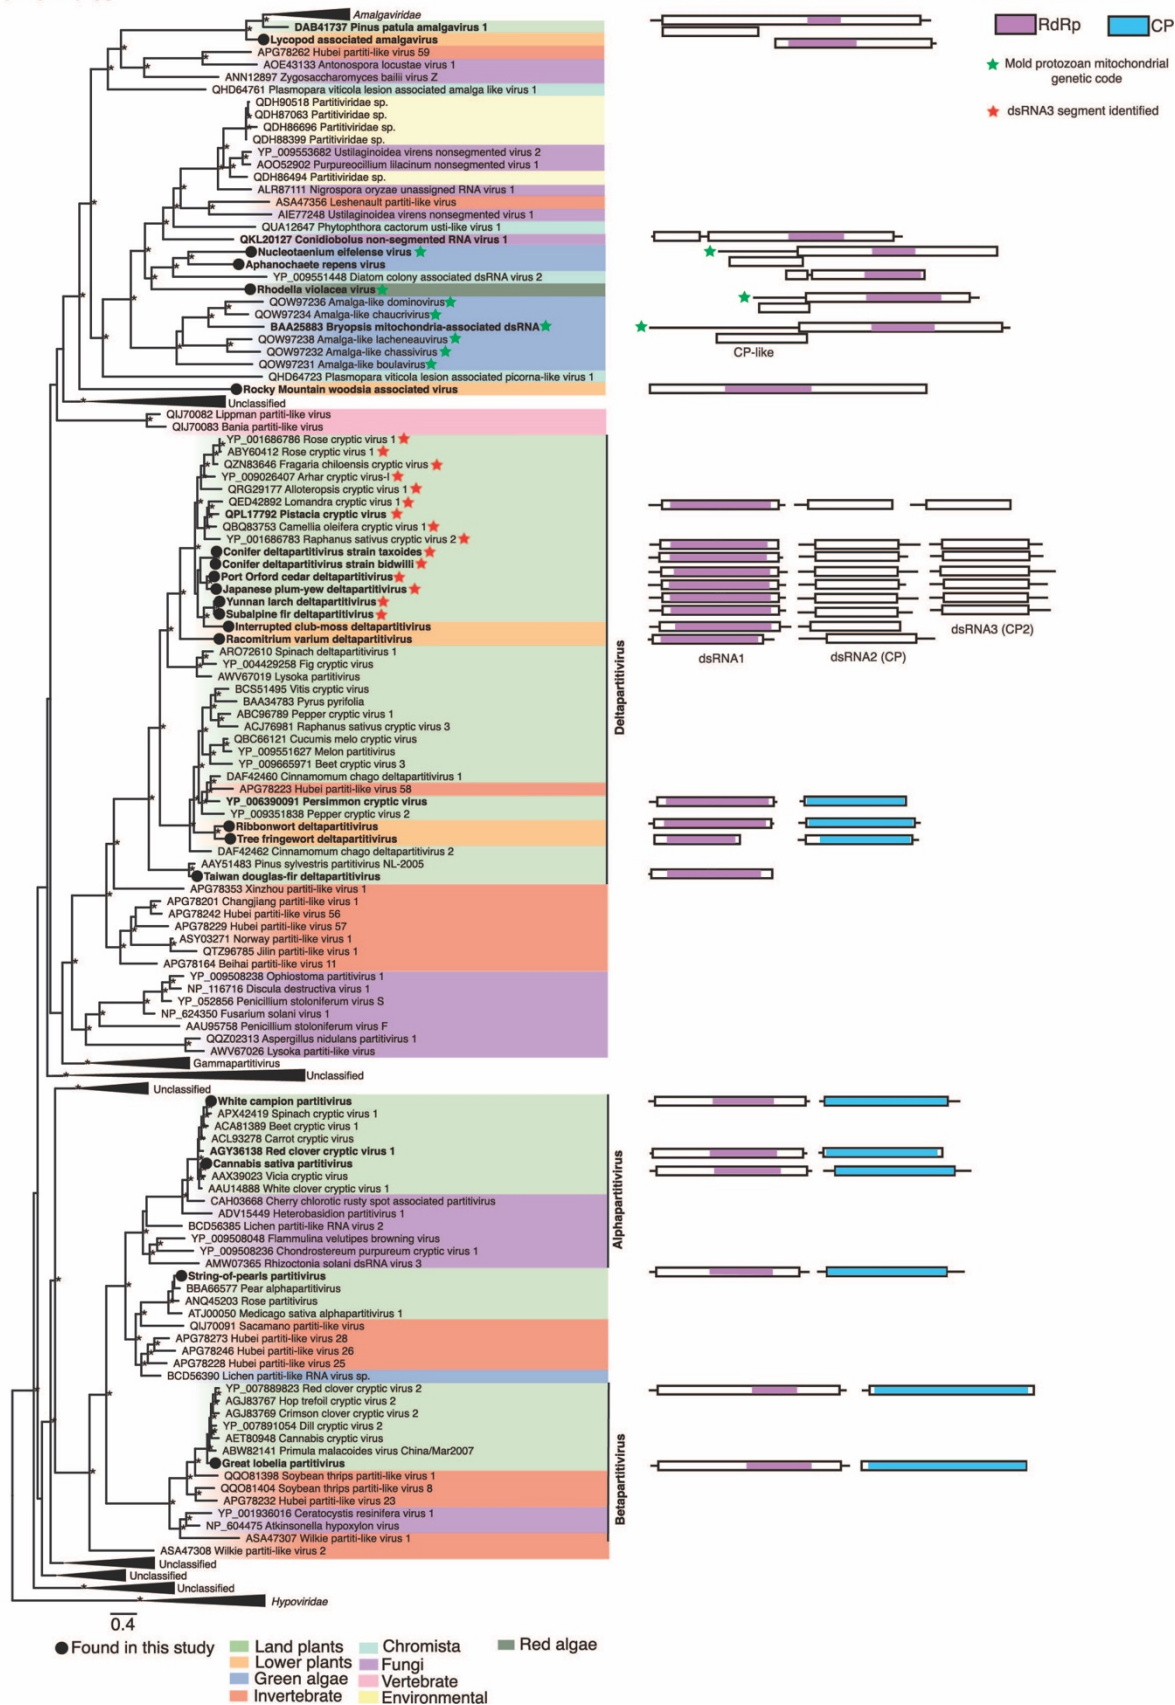

703 **Figure 10.** Left: Phylogenetic relationships of the viruses within the order *Durnavirales*. ML  
704 phylogenetic trees based on the replication protein show the topological position of the virus-like  
705 sequences discovered in this study (black circles) in the context of their closest relatives. See  
706 Figure 3 for the colour scheme. Green stars are used to signify sequences that have been  
707 translated using the protozoan mitochondrial genetic code. Red stars are used to signify  
708 sequences for which a dsRNA3 coat protein-like segment has been described. All branches are  
709 scaled to the number of amino acid substitutions per site and trees were mid-point rooted for  
710 clarity only. An asterisk indicates node support of >70% bootstrap support. Tip labels are bolded  
711 when the genome structure is shown on the right. Right: Genomic organization of the virus  
712 sequences identified in this study and representative species used in the phylogeny.

713 ***Partitiviridae*.** We detected 14 sequences that share a resemblance with members of the  
714 *Partitiviridae*. For each of these sequences, complete dsRNA1 and dsRNA2 segments were  
715 recovered. Ten sequences were found in non-flowering plants and cluster within the  
716 deltapartitiviruses. A clade within the deltapartitiviruses is known to encode a third segment  
717 comprising of a divergent dsRNA2 full-length capsid protein with unknown function (Figure 10).  
718 We identified dsRNA3 segments in related conifer associated sequences but not in those found  
719 in moss and lycophyte libraries (Figure 10). Phylogenies estimated on the coding sequences of  
720 dsRNA2 and dsRNA3 reveal essentially the same grouping which is largely consistent with the  
721 host phylogeny (SI Figure 4). We extend the known host range of the deltapartitiviruses to  
722 include liverworts, mosses, and lycophytes. The remaining sequences were found in eudicots  
723 and cluster with known plant partitiviruses (Figure 10). The white campion was judged to have  
724 contamination from ginseng and chickweed (31). However, the relatively low proportion of the  
725 library these contaminants compose (<1%) suggests that it is unlikely these species are the

726 host of WcPV (Figure 2). There is no evidence that the other partiti-like sequences discovered  
727 are derived from contaminants.

728 ***Ghabrivirales***

729 ***Chrysoviridae***. We identified two partial sequences that share resemblance with members of  
730 the alphachrysovirus denoted *Mesotaenium kramstae alphachyrso-like virus* (MkACV) and  
731 *Tree fringewort alphachyrso-like virus* (TwACV) (Figure 11). A complete RNA2 segment was  
732 recovered for MkACV which shared similarity with the p98 of various chrysovirus (Figure 11).  
733 The MkACV RNA2 segment did not contain the “PGDGXCXXHX” motif commonly found in this  
734 protein (81). To our knowledge, these sequences represent the first chrysovirus in liverworts  
735 and algae. While reads belonging to fungi were found in the libraries MkACV and TwACV were  
736 assembled from, the phylogenetic positioning of the viruses suggest that they are plant-derived  
737 (Figure 2, Figure 11).

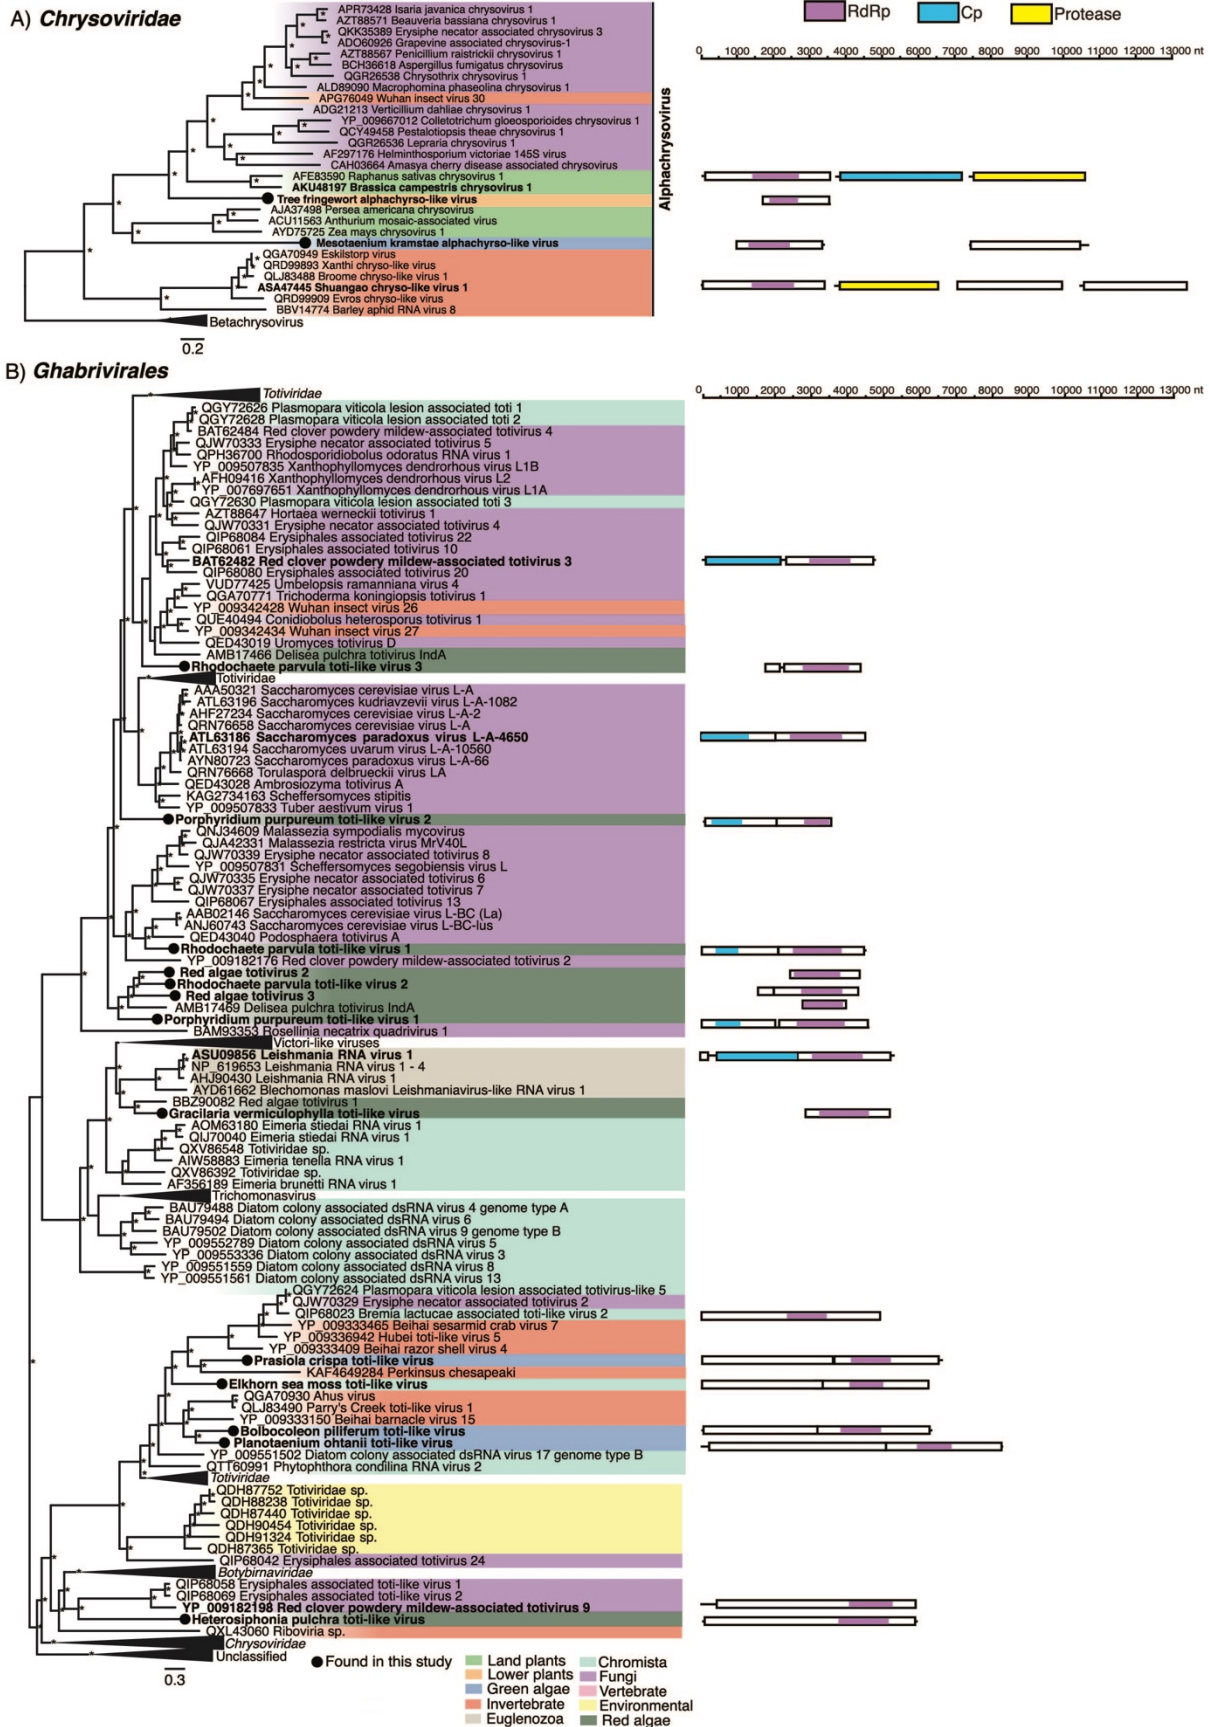

739 **Figure 11.** Left: Phylogenetic relationships of the viruses within the order *Ghabrivirales*. (A) A  
740 phylogeny of the *Chrysoviridae*, (B) an order level phylogeny. ML phylogenetic trees based on  
741 the replication protein show the topological position of the virus-like sequences discovered in  
742 this study (black circles) in the context of their closest relatives. See Figure 3 for the colour  
743 scheme. Green stars are used to signify sequences that have been translated using the  
744 protozoan mitochondrial genetic code. All branches are scaled to the number of amino acid  
745 substitutions per site and trees were mid-point rooted for clarity only. An asterisk indicates node  
746 support of >70% bootstrap support. Virus taxonomic names are labelled to the right. Right:  
747 Genomic organization of the virus sequences identified in this study and representative species  
748 used in the phylogeny.

749 **Totiviridae.** Thirteen sequences sharing similarities to toti-like viruses were discovered in eight  
750 red and green algae transcriptomes. All sequences share less than 50% amino acid identity  
751 across their coding sequence, as such we consider each a putative toti-like viruses. Among  
752 these sequences four cluster with *Delisea pulchra totivirus IndA* (AMB17469.1) to form a red  
753 alga associated clade basal to the totiviruses (Figure 11). *Gracilaria vermiculophylla toti-like*  
754 *virus* (GrveTV) along with *Red algae totivirus 1* (BBZ90082) form a sister group to the protozoan  
755 infecting leishmaniaviruses (Figure 11). The remaining sequences are phylogenetically  
756 positioned across the tree of toti-like viruses, commonly occupying basal positions (Figure 11).  
757 *Prasiola crispa* is contaminated by reads from the fungi, *Candida albicans*. *Prasiola crispa toti-*  
758 *like virus* (PrcrTV), clusters with unclassified protist, fungi, invertebrate and algae viruses  
759 including *Elkhorn sea moss toti-like virus* (EsmTV) (Figure 2, Figure 11). The Kappaphycus  
760 alvarezii transcriptome in which EsmTV was found showed no evidence of contamination  
761 suggesting that PrcrTV may also be derived from algae (Figure 2). The *Mazzaella japonica*  
762 transcriptome in which *Red algae toti-like virus 2:3* (RedTV2/3) were discovered was



763 predominantly composed of reads associated with the red algae genera *Chondrus*. As >99% of  
764 reads in this library belong to red algae species RedTV2 and RedTV3 have been assigned to  
765 this group. The *Porphyridium purpureum* transcriptome is highly contaminated by reads  
766 belonging to flowering plants and an unidentified cloning vector (M10197.1) (Figure 2). The  
767 phylogenetic positioning of the viruses discovered from this transcriptome (*Porphyridium*  
768 *purpureum toti-like virus 1 & 2*) point towards being derived from red algae rather than flowering  
769 plants (Figure 11).

### 770 **3.4 Long-term virus-host evolutionary relationships**

771 To examine the frequency of cross-species transmission and co-divergence among plant  
772 viruses, we estimated tanglegrams that depict pairs of rooted phylogenetic trees displaying the  
773 evolutionary relationship between a virus family and their hosts. This revealed cross-species  
774 transmission as the predominate evolutionary event predicted among all the RNA virus groups  
775 analysed (median 65%, range 46%-79%) (Figure 12). Cross-species transmission was most  
776 frequent in the *Betaflexiviridae* (79%) and the subfamily *Betarhabdovirinae* (79%). Virus-host  
777 co-divergence (median 23%, range 14%-29%) and to a lesser extent duplication (i.e.,  
778 speciation) (median 4.6%, range 1.4%-24%) and extinction events (median 2.9%, range 0%-  
779 11%) were detected across plant virus families (Figure 12). Co-divergence was most frequently  
780 predicted in the *Benyviridae* and *Tymoviridae* representing 29% and 26% of events respectively.  
781 Importantly, however, the results of our co-phylogenetic analysis are undoubtedly influenced by  
782 the sample of plant viruses and will likely change as the number of plant viruses identified  
783 increases.

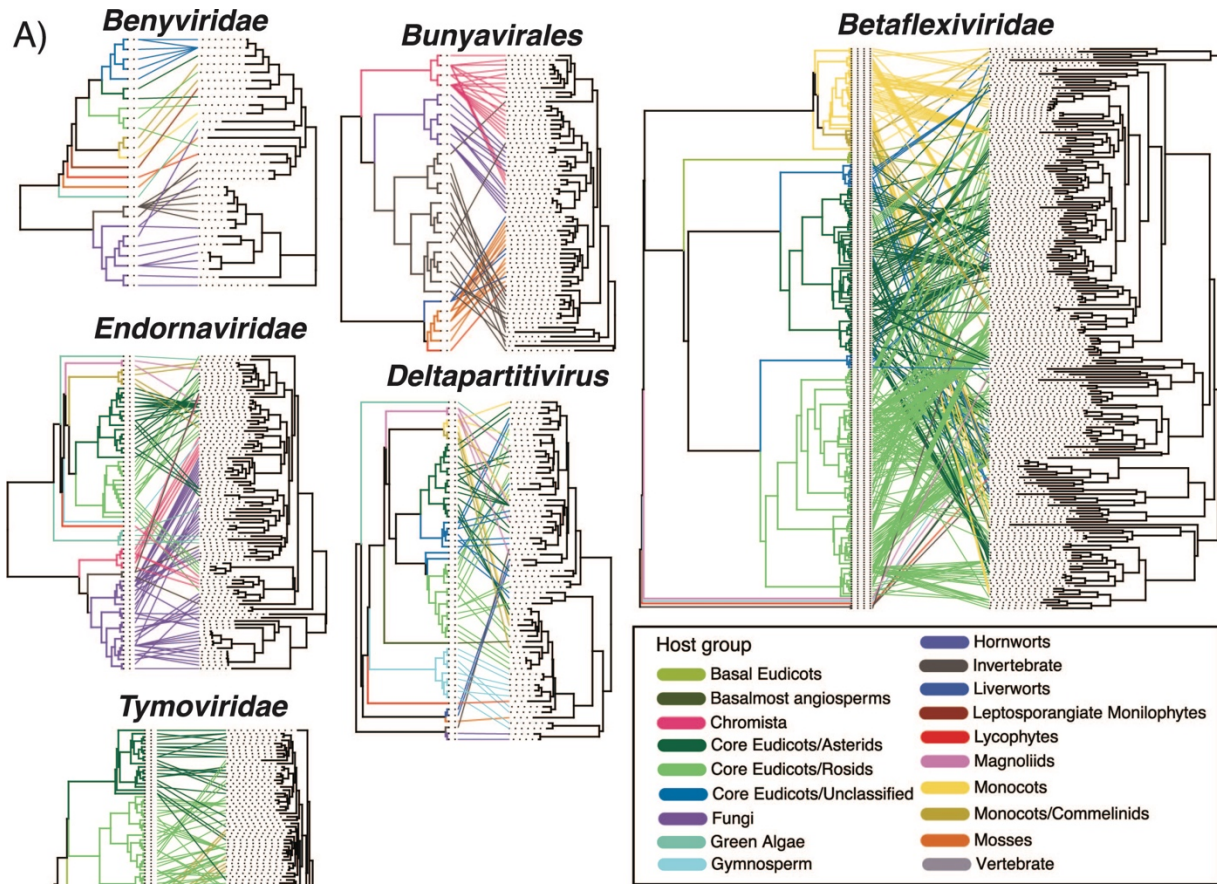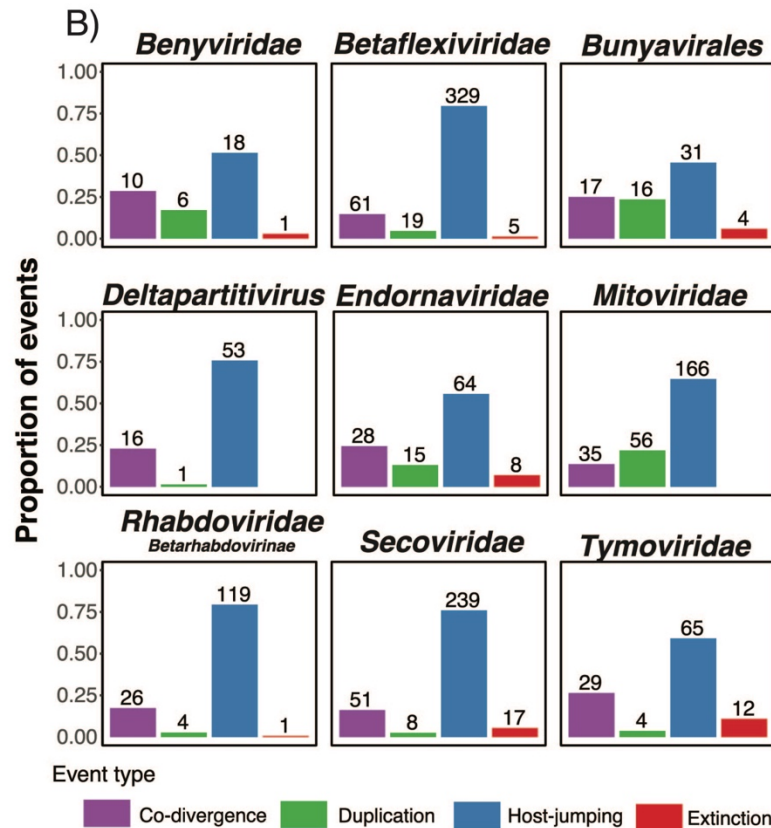



785 **Figure 12.** (A) Tanglegram of rooted phylogenetic trees for select virus groups and their hosts.  
786 Lines and branches are coloured to represent host clade. The cophylo function implemented in  
787 phytools (v0.7-80) was used to maximise the congruence between the host (left) and virus  
788 (right) phylogenies. Supplementary Figure 5 provides the names of the hosts and viruses along  
789 with additional tanglegrams for the *Secoviridae* and *Rhabdoviridae*. (B). Reconciliation analysis  
790 of select virus groups. Barplots illustrate the range of the proportion of possible events and are  
791 coloured by event type.

792

#### 793 **4. Discussion**

794 Our ability to reconstruct the evolutionary history of plant viruses and understand the drivers of  
795 their emergence has been constrained by inadequate sampling across the enormous, extant  
796 diversity of plant species. Here, we provide a large-scale virus discovery project based on  
797 mining transcriptomes from across the entire breadth of the plant kingdom. In doing so we have  
798 identified 104 potentially novel virus species. We considerably expand upon the known host  
799 range of 13 virus families to now include lower plants and expand a further four virus families to  
800 include host associations with algae. We also find the first evidence of a movement protein with  
801 a predicted molecular weight of ~30 kDa (herein referred to as a “30K MP”) in a virus of non-  
802 vascular plants. Collectively, this new knowledge advances our understanding of RNA virus  
803 diversity across the Archaeplastida.

#### 804 **4.1 RNA viruses are widespread across lower plant lineages**

805 To date, viral surveys in basal plant lineages (namely ferns, bryophytes and algae) have  
806 revealed only the minimal occurrence of (+)RNA viruses (5, 17, 20, 78, 82, 83), supporting the  
807 idea that RNA viromes in angiosperms evolved as they diversified during the Cretaceous (84).

808 However, our results potentially challenge this paradigm as we detected the first evidence of  
809 sets of (+)ssRNA viruses in lower plants and algae, implying that these groups are associated  
810 with older lineages of plants. Several of these viruses are deep branching and sit basal to  
811 angiosperm infecting viruses (e.g., LycoAV and LyBuV) in phylogenetic trees. Other viruses  
812 discovered here occupy ambiguous positions between established plant virus families (e.g.,  
813 OnV) or cluster in large numbers to form novel plant-associated clades (e.g., the  
814 *Viridibunyaviridae* in the *Bunyavirales*). Benyviruses are typically transmitted by the root-  
815 infecting plasmodiophorids *Polymyxa betae* and *Polymyxa graminis* (85, 86). The Phytomyxids  
816 (plasmodiophorids and phagomyxids) are parasites of plants, diatoms, oomycetes and brown  
817 algae and have been shown to demonstrate cross-kingdom host shifts (e.g., between  
818 angiosperms and oomycetes) (87). As such the plasmodiophorids may be a vehicle for cross-  
819 species transmission between aquatic protists and land plants (5). FeBV, a beny-like virus  
820 identified in this study, formed a clade along with *Wheat stripe mosaic virus* distinct from  
821 members of the genus *Benyvirus*. Deciphering the evolutionary history and mode of  
822 transmission for the lower plant beny-like viruses will require further studies with particular  
823 emphasis on these taxa. Interestingly, no plasmodiophorid-associated reads were detected in  
824 any of the libraries from which we assembled a beny-like virus. LjBV and WasBV appear  
825 distantly related to the benyviruses. These viruses group with a suite of unclassified viruses  
826 assembled from a soil metatranscriptome study suggesting that, like the benyviruses, this larger  
827 group of unclassified viruses may involve soil-borne parasites like the plasmodiophorids (88).  
828 Our detection of tymovirid-like sequences in the lycophytes, bryophytes and brown algae  
829 dramatically expands the known host range of the *Tymovirales*. Several of these viruses were  
830 similar to unclassified Riboviria species assembled from a recent survey of common wild oat soil  
831 rhizosphere and detritosphere (88) (Figure 4). The metatranscriptome of the sequenced soil  
832 samples from the common wild oat study was largely composed of Viridiplantae, fungi,

833 Amoebozoa, protists, nematodes, and other eukaryotes. As such, using phylogenetic clusters to  
834 infer host associations of our viruses remains challenging. Indeed, these viruses may result  
835 from contamination from other eukaryotes (e.g., fungi or invertebrates) although we found no  
836 consistent evidence among these viruses (Figure 2). Assuming these viruses are plant-  
837 associated, their phylogenetic pattern suggests that they may have resulted from cross-kingdom  
838 transmission events that frequent the Alsuviricetes.

839 The partial deltaflexi-like virus we detected in *P. agnata* (PaADV) is particularly noteworthy. The  
840 deltaflexiviruses are only known to infect fungi, although no fungi associated reads were found  
841 in the *P. agnata* metatranscriptome (Figure 2). The mycovirus families *Delta-* and  
842 *Gammaplexiviridae* are thought to have been derived from the plant alpha- and betaflexivirids  
843 through cross-species transmission (5, 89)). As such PaAGV could potentially represent an  
844 intermediate between the plant and fungi flexiviruses or perhaps a more recent fungus to plant  
845 transmission. As only a fragment of the polymerase gene was assembled for this virus future  
846 work should confirm the presence of PaAGV and its phylogenetic position.

#### 847 **4.2 The extension of the *Mitoviridae* to a lycophyte host**

848 Through the analysis of mitoviruses-like, non-retroviral endogenous RNA viral elements  
849 (NERVEs), it was argued that the origin of plant mitovirus NERVEs was a single horizontal  
850 transfer from a fungal mitovirus before the origin of vascular plants in the early Silurian, ~400  
851 MYA (90). Evidence of contemporary mitoviruses in flowering plants and a fern have challenged  
852 this view, suggesting that a lineage of plant rather than fungal mitoviruses are the immediate  
853 ancestors of plant mitovirus NERVEs (16). Indeed, plant-to-fungus transmission would eliminate  
854 code conflicts between fungi and plant mitochondrial genetic codes (76). Herein, we  
855 demonstrate the existence of a lower plant-associated sister clade to the angiosperm  
856 mitoviruses and NERVEs. This clade includes a clubmoss associated mitovirus, the most

857 primitive plant mitovirus sequence to date. This finding aligns with the estimation of the origin of  
858 plant mitovirus NERVEs occurring as early as the evolution of the clubmoss (90). The recent  
859 finding of mitoviruses in green algae – including BopiMV in this study – highlight the broad host  
860 range of mitoviruses (78, 83). The phylogenetic position of these viruses and the absence of  
861 NERVEs from these groups suggest that they are not the ancestors of land plant mitoviruses  
862 and NERVEs.

#### 863 **4.4 Establishment of a new virus family in the *Bunyavirales*: *Viridisbunyaviridae***

864 We identified 16 bunya-like viruses assembled from six non-vascular plant libraries including  
865 liverwort, moss, and lycophyte species. These viruses form a novel clade within the  
866 *Bunyavirales* and represent the first viruses in this order to be associated with lower plants. This  
867 clade likely represents a novel virus family which we have tentatively named the  
868 *Viridisbunyaviridae*. Several libraries contained up to five distinct viruses (each sharing <70%  
869 nucleotide identity). Virus co-infections are frequently observed in plants and have been  
870 reported in the closest relatives of these viruses, the *Deltamycobunyaviridae* (91, 92). As with  
871 previous studies we were only able to recover the bunyavirus L segment (92, 93). Further  
872 studies are needed to recover the missing small and medium-sized segments and to confirm the  
873 presence of mixed infections in plants.

#### 874 **4.5 Discovery of the first 30 kDa movement protein in non-vascular plants**

875 Through the discovery of lower plant-associated viruses, we have gained insights into how the  
876 genome structure and composition of contemporary flowering plants viruses have evolved. The  
877 detection of secovirid-like sequences in bryophytes and ferns represents the first occurrence of  
878 plant secoviruses outside of angiosperms and the first evidence of a 30K MP homolog in non-  
879 vascular plants. These proteins aid the cell-to-cell movement of viruses in plants. For example,

880 the MP of *Cucumber mosaic virus* increases the size exclusion limit of plasmodesmata allowing  
881 virus particles to pass through cell walls (94). To date, homologs of 30K MP have only been  
882 detected in plant viruses infecting angiosperms to the lycophytes (17, 95). Further work is  
883 needed to confirm the presence and function of 30K MPs in viruses infecting the bryophytes and  
884 other lower plants.

#### 885 **4.6 Detection of Deltapartivirus dsRNA3 segments in gymnosperms but not in non-** 886 **vascular plants**

887 Our discovery of six tri-segmented deltapartivirus species provides insights into the evolution of  
888 the deltapartivirus dsRNA3 segment. dsRNA3 segments have been found in several alpha-  
889 and deltapartiviruses infecting flowering plants (96-99). These segments typically encode  
890 seemingly full-length capsid protein or in the case of alphapartivirus *Rosellinia necatrix*  
891 *partivirus 2*, a truncated version of the RdRp which may serve as an interfering RNA (100).  
892 There is some debate as to the source of dsRNA3 segments, particularly whether they are  
893 satellite viruses that co-opt the RdRp of the co-infecting helper viruses or that the additional  
894 segment is a result of coinfection of two different plant partitiviruses and the second RdRp-  
895 encoding segment is lost after the initial infection (101). For the first time, we find dsRNA3  
896 segments in conifer associated viruses but not in those found in lower plants including  
897 bryophytes and lycophytes. The absence of dsRNA3 in non-vascular plants means that it is  
898 possible that this segment evolved after the divergence of vascular and non-vascular plants in  
899 the Silurian period (102). It is possible that dsRNA3 segments exist for the non-vascular plant  
900 infecting deltapartiviruses but was not detected due to the large degree of divergence between  
901 this segment and reference sequences (including those found in this study). However, the  
902 dsRNA1 and dsRNA2 segments of the putative lower plant deltapartiviruses shared >50% aa  
903 identity with the tri-segmented deltapartiviruses - well above the detection limit for tools such

904 as Diamond BlastX (37). dsRNA3 segments typically appear no more divergent than dsRNA2  
905 segments therefore it is unlikely that we would be able to detect both the dsRNA1 and dsRNA2  
906 segments without detecting dsRNA3. Further work is needed to confirm the presence of  
907 deltapartitivirus dsRNA3 segments.

#### 908 **4.7 Discovery of an unsegmented varicosavirus-like viruses in ferns and liverworts**

909 Finally, the recently discovered gymnosperm varicose-like *Pinus flexilis virus 1* in the family  
910 *Rhabdoviridae* contains an unsegmented genome organisation that differs from the typical bi-  
911 segmented structure of the varicosaviruses (25, 103). We find the bi-segmented structure in  
912 varicosavirus-like viruses for the first time in ferns and liverworts (TfVV and MgVV) which  
913 predate the gymnosperms.

#### 914 **4.8 Caveats**

915 Importantly, the data generated under the 1KP were not explicitly created for virus discovery,  
916 such that there are important caveats associated with the methods and metatranscriptomic data  
917 mined for virus contigs. For instance, as axenic cultures are not a viable option in most  
918 instances, the 1KP samples are commonly contaminated by nucleic acids belonging to  
919 bacterial, fungal, and insect species. We addressed this by using a combination of host/virus  
920 abundance measurements and phylogenetic analyses to improve the accuracy of virus-host  
921 assignments. For most of the viruses described, phylogenetic placement within plant infecting  
922 virus families strongly supports their association with plants. However, several of the viruses  
923 found in algae and lower plants were associated with lineages known to infect invertebrates and  
924 fungi or unclassified viruses recovered from environmental samples. The association between  
925 the viruses of lower plants and algae with that of fungi and invertebrate viruses may reflect the

926 absence of algal and lower plant viruses in reference sequence databases. Experimental  
927 confirmation is needed to formally assign the viruses discovered in this study to their hosts.

928 The average sequencing depth of the 1KP libraries was 1.99 gigabases of sequence per  
929 sample (range 1.3-3.0), lower than many other virus discovery studies (6, 104, 105).

930 Sequencing depth has been shown to correlate with the ability to detect viruses present at low  
931 abundance (106, 107). Further, a large proportion of the virus transcripts detected were from  
932 viruses whose full-length genomic or subgenomic mRNAs were polyadenylated at the 3' end (SI  
933 Table 4, Figure 1). Although this was anticipated (i.e. the libraries generated by the 1KP  
934 initiative were prepared from polyA+ RNA), it limited the detection of non-polyadenylated viruses  
935 (e.g., dsRNA, dsDNA) and may have contributed to the lack of phycodnavirus sequences  
936 detected in algae (107).

937 To reduce the computational burden of assembly, we attempted to remove host-associated  
938 reads before contig assembly by mapping them to the host scaffolds provided by the 1KP  
939 initiative. While this step reduces the occurrence of false-positive virus detection it also risks  
940 removing virus reads, particularly reverse-transcribing plant viruses (108). While we frequently  
941 detected transcripts associated with the reverse-transcribing family *Caulimoviridae*, no members  
942 of the *Metaviridae* or *Pseudoviridae* were detected.

### 943 **Acknowledgements**

944 We thank Richard Miller for computational support and Justine Charon for advice on alignments.  
945 This work would not have been possible without the data generously provided by the One  
946 Thousand Plant Transcriptomes Initiative.

947

948



949 **Funding**

950 J.C.O.M. was supported by the William Macleay Microbiological Research Fund from the  
951 Linnean Society of NSW. R.V.G. was funded by a Discovery Early Career Researcher Award  
952 (DECRA) (DE170100208) and E.C.H. was funded by an ARC Australian Laureate Fellowship  
953 (FL170100022) from the Australian Research Council. J.L.G. was funded by a New Zealand  
954 Royal Society Rutherford Discovery Fellowship (RDF-20-UOO-007).

955 **References**

- 956 1. Anderson JT. 2016. Plant fitness in a rapidly changing world. *New Phytologist* 210:81-  
957 87.
- 958 2. Wren JD, Roossinck MJ, Nelson RS, Scheets K, Palmer MW, Melcher U. 2006. Plant  
959 virus biodiversity and ecology. *PLoS Biology* 4:80.
- 960 3. Mifsud JCO. 2020. Explorations of the plant virosphere.
- 961 4. Roossinck MJ, Martin DP, Roumagnac P. 2015. Plant virus metagenomics: advances in  
962 virus discovery. *Phytopathology* 105:716-727.
- 963 5. Dolja VV, Krupovic M, Koonin EV. 2020. Deep roots and splendid boughs of the global  
964 plant virome. *Annual review of phytopathology* 58:23-53.
- 965 6. Shates TM, Sun P, Malmstrom CM, Dominguez C, Mauck KE. 2019. Addressing  
966 Research Needs in the Field of Plant Virus Ecology by Defining Knowledge Gaps and  
967 Developing Wild Dicot Study Systems. *Frontiers in Microbiology* 9.
- 968 7. Dolja VV, Koonin EV. 2018. Metagenomics reshapes the concepts of RNA virus  
969 evolution by revealing extensive horizontal virus transfer. *Virus Research* 244:36-52.
- 970 8. Veliceasa D, Enünlü N, Kós PB, Köster S, Beuther E, Morgun B, Deshmukh SD, Lukács  
971 N. 2006. Searching for a new putative cryptic virus in *Pinus sylvestris* L. *Virus Genes*  
972 32:177-186.
- 973 9. Sidharthan VK, Kalaivanan NS, Baranwal VK. 2021. Discovery of putative novel viruses  
974 in the transcriptomes of endangered plant species native to India and China. *Gene*  
975 786:145626.
- 976 10. Han S, Karasev A, Ieki H, Iwanami T. 2002. Nucleotide sequence and taxonomy of  
977 *Cycas necrotic stunt virus*. *Archives of virology* 147:2207-2214.

- 978 11. Yang S, Shan T, Wang Y, Yang J, Chen X, Xiao Y, You Z, He Y, Zhao M, Lu J. 2020.  
979 Virome of riverside phytocommunity ecosystem of an ancient canal.
- 980 12. Nibert ML, Pyle JD, Firth AE. 2016. A +1 ribosomal frameshifting motif prevalent among  
981 plant amalgaviruses. *Virology* 498:201-208.
- 982 13. Dawes C. 2016. Chapter 4 - Macroalgae Systematics, p 107-148. *In* Fleurence J, Levine  
983 I (ed), *Seaweed in Health and Disease Prevention* doi:[https://doi.org/10.1016/B978-0-](https://doi.org/10.1016/B978-0-12-802772-1.00004-X)  
984 [12-802772-1.00004-X](https://doi.org/10.1016/B978-0-12-802772-1.00004-X). Academic Press, San Diego.
- 985 14. Christenhusz MJ, Byng JW. 2016. The number of known plants species in the world and  
986 its annual increase. *Phytotaxa* 261:201-217.
- 987 15. Valverde RA, Sabanadzovic S. 2009. A novel plant virus with unique properties infecting  
988 Japanese holly fern. *Journal of General Virology* 90:2542-2549.
- 989 16. Nibert ML, Vong M, Fugate KK, Debat HJ. 2018. Evidence for contemporary plant  
990 mitoviruses. *Virology* 518:14-24.
- 991 17. Mushegian A, Shipunov A, Elena SF. 2016. Changes in the composition of the RNA  
992 virome mark evolutionary transitions in green plants. *BMC biology* 14:68.
- 993 18. Short SM, Staniewski MA, Chaban YV, Long AM, Wang DL. 2020. Diversity of Viruses  
994 Infecting Eukaryotic Algae. *Current Issues in Molecular Biology* 39:29-61.
- 995 19. Gibbs AJ, Torronen M, Mackenzie AM, Wood JT, Armstrong JS, Kondo H, Tamada T,  
996 Keese PL. 2011. The enigmatic genome of *Chara australis* virus. *Journal of General*  
997 *Virology* 92:2679-2690.
- 998 20. Vlok M, Gibbs AJ, Suttle CA. 2019. Metagenomes of a freshwater charavirus from British  
999 Columbia provide a window into ancient lineages of viruses. *Viruses* 11.
- 1000 21. Han G-Z. 2019. Origin and evolution of the plant immune system. *New Phytologist*  
1001 222:70-83.

- 1002 22. Brunkard JO, Zambryski PC. 2017. Plasmodesmata enable multicellularity: new insights  
1003 into their evolution, biogenesis, and functions in development and immunity. *Current*  
1004 *Opinion in Plant Biology* 35:76-83.
- 1005 23. Greninger AL. 2018. A decade of RNA virus metagenomics is (not) enough. *Virus*  
1006 *Research* 244:218-229.
- 1007 24. Miller AK, Mifsud JCO, Costa VA, Grimwood RM, Kitson J, Baker C, Brosnahan CL,  
1008 Pande A, Holmes EC, Gemmell NJ, Geoghegan JL. 2021. Slippery when wet: cross-  
1009 species transmission of divergent coronaviruses in bony and jawless fish and the  
1010 evolutionary history of the Coronaviridae. *Virus Evolution* doi:10.1093/ve/veab050.
- 1011 25. Bejerman N, Dietzgen RG, Debat H. 2021. Illuminating the Plant Rhabdovirus  
1012 Landscape through Metatranscriptomics Data. *Viruses* 13:1304.
- 1013 26. Parry R, Wille M, Turnbull OMH, Geoghegan JL, Holmes EC. 2020. Divergent Influenza-  
1014 Like Viruses of Amphibians and Fish Support an Ancient Evolutionary Association.  
1015 *Viruses* 12:1042.
- 1016 27. Grimwood RM, Holmes EC, Geoghegan JL. 2021. A Novel Rubi-Like Virus in the Pacific  
1017 Electric Ray (*Tetronarce californica*) Reveals the Complex Evolutionary History of the  
1018 Matonaviridae. *Viruses* 13.
- 1019 28. Gilbert KB, Holcomb EE, Allscheid RL, Carrington JC. 2019. Hiding in plain sight: New  
1020 virus genomes discovered via a systematic analysis of fungal public transcriptomes.  
1021 *PLoS One* 14:e0219207.
- 1022 29. Lauber C, Seitz S, Mattei S, Suh A, Beck J, Herstein J, Börold J, Salzburger W, Kaderali  
1023 L, Briggs JAG, Bartenschlager R. 2017. Deciphering the Origin and Evolution of  
1024 Hepatitis B Viruses by Means of a Family of Non-enveloped Fish Viruses. *Cell host &*  
1025 *microbe* 22:387-399.e6.

- 1026 30. Leebens-Mack JH, Barker MS, Carpenter EJ, Deyholos MK, Gitzendanner MA, Graham  
1027 SW, Grosse I, Li Z, Melkonian M, Mirarab S, Porsch M, Quint M, Rensing SA, Soltis DE,  
1028 Soltis PS, Stevenson DW, Ullrich KK, Wickett NJ, DeGironimo L, Edger PP, Jordon-  
1029 Thaden IE, Joya S, Liu T, Melkonian B, Miles NW, Pokorny L, Quigley C, Thomas P,  
1030 Villarreal JC, Augustin MM, Barrett MD, Baucom RS, Beerling DJ, Benstein RM, Biffin E,  
1031 Brockington SF, Burge DO, Burris JN, Burris KP, Burtet-Sarramegna V, Caicedo AL,  
1032 Cannon SB, Çebi Z, Chang Y, Chater C, Cheeseman JM, Chen T, Clarke ND, Clayton  
1033 H, Covshoff S, et al. 2019. One thousand plant transcriptomes and the phylogenomics of  
1034 green plants. *Nature* 574:679-685.
- 1035 31. Carpenter EJ, Matasci N, Ayyampalayam S, Wu S, Sun J, Yu J, Jimenez Vieira FR,  
1036 Bowler C, Dorrell RG, Gitzendanner MA, Li L, Du W, K. Ullrich K, Wickett NJ, Barkmann  
1037 TJ, Barker MS, Leebens-Mack JH, Wong GK-S. 2019. Access to RNA-sequencing data  
1038 from 1,173 plant species: The 1000 Plant transcriptomes initiative (1KP). *GigaScience* 8.
- 1039 32. Johnson MT, Carpenter EJ, Tian Z, Bruskiwich R, Burris JN, Carrigan CT, Chase MW,  
1040 Clarke ND, Covshoff S, dePamphilis CW. 2012. Evaluating methods for isolating total  
1041 RNA and predicting the success of sequencing phylogenetically diverse plant  
1042 transcriptomes. *PLoS One* 7:e50226.
- 1043 33. Leinonen R, Sugawara H, Shumway M, Collaboration INSD. 2010. The sequence read  
1044 archive. *Nucleic acids research* 39:19-21.
- 1045 34. Langmead B, Salzberg SL. 2012. Fast gapped-read alignment with Bowtie 2. *Nature*  
1046 *Methods* 9:357-359.
- 1047 35. Haas BJ, Papanicolaou A, Yassour M, Grabherr M, Blood PD, Bowden J, Couger MB,  
1048 Eccles D, Li B, Lieber M, MacManes MD, Ott M, Orvis J, Pochet N, Strozzi F, Weeks N,  
1049 Westerman R, William T, Dewey CN, Henschel R, Leduc RD, Friedman N, Regev A.

- 1050 2013. De novo transcript sequence reconstruction from RNA-seq using the Trinity  
1051 platform for reference generation and analysis. *Nature Protocols* 8:1494-1512.
- 1052 36. Altschul SF, Gish W, Miller W, Myers EW, Lipman DJ. 1990. Basic local alignment  
1053 search tool. *Journal of Molecular Biology* 215:403-410.
- 1054 37. Buchfink B, Xie C, Huson DH. 2015. Fast and sensitive protein alignment using  
1055 DIAMOND. *Nature Methods* 12:59-60.
- 1056 38. Mihara T, Nishimura Y, Shimizu Y, Nishiyama H, Yoshikawa G, Uehara H, Hingamp P,  
1057 Goto S, Ogata H. 2016. Linking Virus Genomes with Host Taxonomy. *Viruses* 8:66.
- 1058 39. Gilmer D, Ratti C, Consortium IR. 2017. ICTV Virus taxonomy profile: *Benyviridae*. The  
1059 *Journal of general virology* 98:1571.
- 1060 40. RStudio T. 2020. RStudio: integrated development for R.
- 1061 41. Team RC. 2013. R: A language and environment for statistical computing. Vienna,  
1062 Austria.
- 1063 42. Wickham H, Averick M, Bryan J, Chang W, McGowan LDA, François R, Golemund G,  
1064 Hayes A, Henry L, Hester J. 2019. Welcome to the Tidyverse. *Journal of Open Source  
1065 Software* 4:1686.
- 1066 43. Li B, Dewey CN. 2011. RSEM: accurate transcript quantification from RNA-Seq data  
1067 with or without a reference genome. *BMC Bioinformatics* 12:323.
- 1068 44. Bushnell B. 2014. BBMap: a fast, accurate, splice-aware aligner. Lawrence Berkeley  
1069 National Lab.(LBNL), Berkeley, CA (United States),
- 1070 45. Kearsse M, Moir R, Wilson A, Stones-Havas S, Cheung M, Sturrock S, Buxton S, Cooper  
1071 A, Markowitz S, Duran C. 2012. Geneious Basic: an integrated and extendable desktop  
1072 software platform for the organization and analysis of sequence data. *Bioinformatics*  
1073 28:1647-1649.

- 1074 46. Sievers F, Wilm A, Dineen D, Gibson TJ, Karplus K, Li W, Lopez R, McWilliam H,  
1075 Remmert M, Söding J. 2011. Fast, scalable generation of high-quality protein multiple  
1076 sequence alignments using Clustal Omega. *Molecular systems biology* 7:539.
- 1077 47. Mirdita M, Steinegger M, Söding J. 2019. MMseqs2 desktop and local web server app  
1078 for fast, interactive sequence searches. *Bioinformatics* 35:2856-2858.
- 1079 48. Zimmermann L, Stephens A, Nam S-Z, Rau D, Kübler J, Lozajic M, Gabler F, Söding J,  
1080 Lupas AN, Alva V. 2018. A Completely Reimplemented MPI Bioinformatics Toolkit with a  
1081 New HHpred Server at its Core. *Journal of Molecular Biology* 430:2237-2243.
- 1082 49. Lay CL. 2021. biolumber/littlegenomes: First release. doi:10.5281/ZENODO.5081375.
- 1083 50. Sayers EW, Cavanaugh M, Clark K, Pruitt KD, Schoch CL, Sherry ST, Karsch-Mizrachi I.  
1084 2021. GenBank. *Nucleic acids research* 49:D92-D96.
- 1085 51. Gertz EM, Yu Y-K, Agarwala R, Schäffer AA, Altschul SF. 2006. Composition-based  
1086 statistics and translated nucleotide searches: improving the TBLASTN module of  
1087 BLAST. *BMC biology* 4:1-14.
- 1088 52. Nayfach S, Camargo AP, Schulz F, Eloë-Fadrosh E, Roux S, Kyrpides NC. 2021.  
1089 CheckV assesses the quality and completeness of metagenome-assembled viral  
1090 genomes. *Nature biotechnology* 39:578-585.
- 1091 53. Marcelino VR, Clausen PTLC, Buchmann JP, Wille M, Iredell JR, Meyer W, Lund O,  
1092 Sorrell TC, Holmes EC. 2020. CCMetagen: comprehensive and accurate identification of  
1093 eukaryotes and prokaryotes in metagenomic data. *Genome Biology* 21:103.
- 1094 54. Clausen PT, Aarestrup FM, Lund O. 2018. Rapid and precise alignment of raw reads  
1095 against redundant databases with KMA. *BMC bioinformatics* 19:1-8.
- 1096 55. Ondov BD, Bergman NH, Phillippy AM. 2011. Interactive metagenomic visualization in a  
1097 Web browser. *BMC Bioinformatics* 12:385.



- 1098 56. Capella-Gutiérrez S, Silla-Martínez JM, Gabaldón T. 2009. trimAl: a tool for automated  
1099 alignment trimming in large-scale phylogenetic analyses. *Bioinformatics* 25:1972-1973.
- 1100 57. Nguyen L-T, Schmidt HA, Von Haeseler A, Minh BQ. 2015. IQ-TREE: a fast and  
1101 effective stochastic algorithm for estimating maximum-likelihood phylogenies. *Molecular*  
1102 *biology and evolution* 32:268-274.
- 1103 58. Kalyaanamoorthy S, Minh BQ, Wong TK, Von Haeseler A, Jermiin LS. 2017.  
1104 ModelFinder: fast model selection for accurate phylogenetic estimates. *Nature methods*  
1105 14:587-589.
- 1106 59. Rambaut A, Drummond A. 2012. FigTree: Tree figure drawing tool, version 1.4.0.  
1107 Institute of Evolutionary Biology, University of Edinburgh.
- 1108 60. Zanne AE, Tank DC, Cornwell WK, Eastman JM, Smith SA, FitzJohn RG, McGlinn DJ,  
1109 O’Meara BC, Moles AT, Reich PB. 2014. Three keys to the radiation of angiosperms into  
1110 freezing environments. *Nature* 506:89-92.
- 1111 61. Smith SA, Brown JW. 2018. Constructing a broadly inclusive seed plant phylogeny. *Am*  
1112 *J Bot* 105:302-314.
- 1113 62. Jin Y, Qian H. 2019. V.PhyloMaker: an R package that can generate very large  
1114 phylogenies for vascular plants. *Ecography* 42:1353-1359.
- 1115 63. Hatcher EL, Zhdanov SA, Bao Y, Blinkova O, Nawrocki EP, Ostapchuck Y, Schäffer AA,  
1116 Brister JR. 2017. Virus Variation Resource—improved response to emergent viral  
1117 outbreaks. *Nucleic acids research* 45:D482-D490.
- 1118 64. Paradis E, Schliep K. 2019. ape 5.0: an environment for modern phylogenetics and  
1119 evolutionary analyses in R. *Bioinformatics* 35:526-528.
- 1120 65. Revell LJ. 2012. phytools: an R package for phylogenetic comparative biology (and other  
1121 things). *Methods in Ecology and Evolution* 3:217-223.

- 1122 66. Conow C, Fielder D, Ovadia Y, Libeskind-Hadas R. 2010. Jane: a new tool for the  
1123 cophylogeny reconstruction problem. *Algorithms for Molecular Biology* 5:1-10.
- 1124 67. Santichaivekin S, Yang Q, Liu J, Mawhorter R, Jiang J, Wesley T, Wu Y-C, Libeskind-  
1125 Hadas R. 2020. eMPress: a systematic cophylogeny reconciliation tool. *Bioinformatics*  
1126 doi:10.1093/bioinformatics/btaa978.
- 1127 68. Quast C, Pruesse E, Yilmaz P, Gerken J, Schweer T, Yarza P, Peplies J, Glöckner FO.  
1128 2012. The SILVA ribosomal RNA gene database project: improved data processing and  
1129 web-based tools. *Nucleic acids research* 41:D590-D596.
- 1130 69. Morozov SY, Solovyev AG. 2003. Triple gene block: modular design of a multifunctional  
1131 machine for plant virus movement. *Journal of General Virology* 84:1351-1366.
- 1132 70. Hammond R, Ramirez P. 2001. Molecular characterization of the genome of Maize  
1133 rayado fino virus, the type member of the genus Marafivirus. *Virology* 282:338-347.
- 1134 71. Ding S, Howe J, Keese P, Mackenzie A, Meek D, Osorlo-Keese M, Skotnicki M, Srifah  
1135 P, Torronen M, Gibbs A. 1990. The tymobox, a sequence shared by most tymoviruses:  
1136 its use in molecular studies of tymoviruses. *Nucleic acids research* 18:1181-1187.
- 1137 72. Xie J, Ghabrial SA. 2012. Molecular characterizations of two mitoviruses co-infecting a  
1138 hyovirulent isolate of the plant pathogenic fungus *Sclerotinia sclerotiorum*. *Virology*  
1139 428:77-85.
- 1140 73. Heinze C. 2012. A novel mycovirus from *Clitocybe odora*. *Archives of virology* 157:1831-  
1141 1834.
- 1142 74. Nibert ML. 2017. Mitovirus UGA (Trp) codon usage parallels that of host mitochondria.  
1143 *Virology* 507:96-100.
- 1144 75. Zhang T, Li W, Chen H, Yu H. 2015. Full genome sequence of a putative novel mitovirus  
1145 isolated from *Rhizoctonia cerealis*. *Archives of virology* 160:1815-1818.

- 1146 76. Shackelton LA, Holmes EC. 2008. The role of alternative genetic codes in viral evolution  
1147 and emergence. *Journal of Theoretical Biology* 254:128-134.
- 1148 77. Nerva L, Turina M, Zanzotto A, Gardiman M, Gaiotti F, Gambino G, Chitarra W. 2019.  
1149 Isolation, molecular characterization and virome analysis of culturable wood fungal  
1150 endophytes in esca symptomatic and asymptomatic grapevine plants. *Environmental*  
1151 *microbiology* 21:2886-2904.
- 1152 78. Charon J, Marcelino VR, Wetherbee R, Verbruggen H, Holmes EC. 2020.  
1153 Metatranscriptomic identification of diverse and divergent RNA viruses in green and  
1154 Chlorarachniophyte algae cultures. *Viruses* 12.
- 1155 79. Koga R, Horiuchi H, Fukuhara T. 2003. Double-stranded RNA replicons associated with  
1156 chloroplasts of a green alga, *Bryopsis cinicola*. *Plant molecular biology* 51:991-999.
- 1157 80. Cai G, Myers K, Hillman BI, Fry WE. 2009. A novel virus of the late blight pathogen,  
1158 *Phytophthora infestans*, with two RNA segments and a supergroup 1 RNA-dependent  
1159 RNA polymerase. *Virology* 392:52-61.
- 1160 81. Covelli L, Coutts RH, Di Serio F, Citir A, Açıkgöz S, Hernandez C, Ragozzino A, Flores  
1161 R. 2004. Cherry chlorotic rusty spot and Amasya cherry diseases are associated with a  
1162 complex pattern of mycoviral-like double-stranded RNAs. I. Characterization of a new  
1163 species in the genus *Chrysovirus*. *Journal of General Virology* 85:3389-3397.
- 1164 82. Rousvoal S, Bouyer B, López-Cristoffanini C, Boyen C, Collén J. 2016. Mutant swarms  
1165 of a totivirus-like entities are present in the red macroalga *Chondrus crispus* and have  
1166 been partially transferred to the nuclear genome. *Journal of phycology* 52:493-504.
- 1167 83. Charon J, Murray S, Holmes EC. 2021. Revealing RNA virus diversity and evolution in  
1168 unicellular algae transcriptomes. *Virus Evolution* 7.
- 1169 84. Kenrick P, Crane PR. 1997. The origin and early evolution of plants on land. *Nature*  
1170 389:33-39.

- 1171 85. Valente JB, Pereira FS, Stempkowski LA, Farias M, Kuhnem P, Lau D, Fajardo TVM,  
1172 Nhani Junior A, Casa RT, Bogó A, da Silva FN. 2019. A novel putative member of the  
1173 family Benyviridae is associated with soilborne wheat mosaic disease in Brazil. *Plant*  
1174 *Pathology* 68:588-600.
- 1175 86. Tamada T, Schmitt C, Saito M, Guilley H, Richards K, Jonard G. 1996. High resolution  
1176 analysis of the readthrough domain of beet necrotic yellow vein virus readthrough  
1177 protein: a KTER motif is important for efficient transmission of the virus by *Polymyxa*  
1178 *betae*. *Journal of General Virology* 77:1359-1367.
- 1179 87. Neuhauser S, Kirchmair M, Bulman S, Bass D. 2014. Cross-kingdom host shifts of  
1180 phytomyxid parasites. *BMC Evolutionary Biology* 14:33.
- 1181 88. Starr EP, Nuccio EE, Pett-Ridge J, Banfield JF, Firestone MK. 2019. Metatranscriptomic  
1182 reconstruction reveals RNA viruses with the potential to shape carbon cycling in soil.  
1183 *Proceedings of the National Academy of Sciences* 116:25900.
- 1184 89. Ghabrial SA, Caston JR, Jiang D, Nibert ML, Suzuki N. 2015. 50-plus years of fungal  
1185 viruses. *Virology* 479-480:356-68.
- 1186 90. Bruenn JA, Warner BE, Yerramsetty P. 2015. Widespread mitovirus sequences in plant  
1187 genomes. *Peerj* 3.
- 1188 91. Moreno Goncalves AB, Lopez-Moya JJ. 2019. When viruses play team sports: mixed  
1189 infections in plants. *Phytopathology* 110:29-48.
- 1190 92. Botella L, Jung T. 2021. Multiple Viral Infections Detected in *Phytophthora condilina* by  
1191 Total and Small RNA Sequencing. *Viruses* 13:620.
- 1192 93. Botella L, Janoušek J, Maia C, Jung MH, Raco M, Jung T. 2020. Marine Oomycetes of  
1193 the Genus *Halophytophthora* Harbor Viruses Related to Bunyaviruses. *Frontiers in*  
1194 *Microbiology* 11.

- 1195 94. Su S, Liu Z, Chen C, Zhang Y, Wang X, Zhu L, Miao L, Wang X-C, Yuan M. 2010.  
1196 Cucumber Mosaic Virus Movement Protein Severs Actin Filaments to Increase the  
1197 Plasmodesmal Size Exclusion Limit in Tobacco *The Plant Cell* 22:1373-1387.
- 1198 95. Mushegian AR, Elena SF. 2015. Evolution of plant virus movement proteins from the  
1199 30K superfamily and of their homologs integrated in plant genomes. *Virology* 476:304-  
1200 315.
- 1201 96. Kumar S, Subbarao BL, Kumari R, Hallan V. 2017. Molecular characterization of a novel  
1202 cryptic virus infecting pigeonpea plants. *PloS one* 12:e0181829.
- 1203 97. Sabanadzovic S, Ghanem-Sabanadzovic NA. 2008. Molecular characterization and  
1204 detection of a tripartite cryptic virus from rose. *Journal of Plant Pathology*:287-293.
- 1205 98. Chen L, Chen J, Liu L, Yu X, Yu S, Fu T, Liu W. 2006. Complete nucleotide sequences  
1206 and genome characterization of double-stranded RNA 1 and RNA 2 in the *Raphanus*  
1207 *sativus*-root cv. Yipinghong. *Archives of virology* 151:849-859.
- 1208 99. Wu LP, Du YM, Xiao H, Peng L, Li R. 2020. Complete genomic sequence of tea-oil  
1209 camellia deltapartivirus 1, a novel virus from *Camellia oleifera*. *Archives of Virology*  
1210 165:227-231.
- 1211 100. Chiba S, Lin YH, Kondo H, Kanematsu S, Suzuki N. 2013. Effects of Defective  
1212 Interfering RNA on Symptom Induction by, and Replication of, a Novel Partivirus from a  
1213 Phytopathogenic Fungus, *Rosellinia necatrix*. *Journal of Virology* 87:2330-2341.
- 1214 101. Nibert ML, Ghabrial SA, Maiss E, Lesker T, Vainio EJ, Jiang D, Suzuki N. 2014.  
1215 Taxonomic reorganization of family Partitiviridae and other recent progress in partivirus  
1216 research. *Virus Research* 188:128-141.
- 1217 102. Harrison CJ, Morris JL. 2018. The origin and early evolution of vascular plant shoots and  
1218 leaves. *Philosophical Transactions of the Royal Society B: Biological Sciences*  
1219 373:20160496.

- 1220 103. Walker PJ, Blasdel KR, Calisher CH, Dietzgen RG, Kondo H, Kurath G, Longdon B,  
1221 Stone DM, Tesh RB, Tordo N. 2018. ICTV virus taxonomy profile: Rhabdoviridae.  
1222 Journal of General Virology 99:447-448.
- 1223 104. Shi M, Lin X-D, Tian J-H, Chen L-J, Chen X, Li C-X, Qin X-C, Li J, Cao J-P, Eden J-S,  
1224 Buchmann J, Wang W, Xu J, Holmes EC, Zhang Y-Z. 2016. Redefining the invertebrate  
1225 RNA virosphere. Nature 540:539.
- 1226 105. Hao X, Zhang W, Zhao F, Liu Y, Qian W, Wang Y, Wang L, Zeng J, Yang Y, Wang X.  
1227 2018. Discovery of plant viruses from tea plant (*Camellia sinensis* (L.) O. Kuntze) by  
1228 metagenomic sequencing. Frontiers in Microbiology 9:2175.
- 1229 106. Maclot F, Candresse T, Filloux D, Malmstrom CM, Roumagnac P, van der Vlugt R,  
1230 Massart S. 2020. Illuminating an ecological blackbox: using high throughput Sequencing  
1231 to characterize the plant virome across scales. Frontiers in Microbiology 11:2575.
- 1232 107. Visser M, Bester R, Burger JT, Maree HJ. 2016. Next-generation sequencing for virus  
1233 detection: covering all the bases. Virology Journal 13:85.
- 1234 108. Llorens C, Muñoz-Pomer A, Bernad L, Botella H, Moya A. 2009. Network dynamics of  
1235 eukaryotic LTR retroelements beyond phylogenetic trees. Biology Direct 4:41.
- 1236 109. Letunic I, Bork P. 2019. Interactive Tree Of Life (iTOL) v4: recent updates and new  
1237 developments. Nucleic acids research 47:W256-W259.
- 1238 110. Brister JR, Ako-Adjei D, Bao Y, Blinkova O. 2015. NCBI viral genomes resource. Nucleic  
1239 Acids Res 43:D571-7.

1240



1241 **Supplementary Information**

1242 **Supplementary Figure 1.** (A) Phylogram of the triple gene block (TGB) protein 1. ML

1243 phylogenetic trees show the topological position of the newly discovered TGB sequence in the

1244 tomato fern (black circle) in the context of the closest relatives. (B) Phylogram of the

1245 Tymoviridae virus coat proteins (CP). ML phylogenetic trees show the topological position of the

1246 newly discovered CP sequences in (black circle) in the context of the closest relatives.

1247 Branches are highlighted to represent virus taxonomy (Maculavirus = green, Marafivirus =

1248 orange, Tymovirus = red and unclassified = grey). For each colour, a lighter shade signifies that

1249 this virus is related to but has not formally been assigned to this genus. (C) Phylogram of the

1250 *Oxera neriifolia associated virus* coat protein (CP). ML phylogenetic trees show the topological

1251 position of the newly discovered CP sequence (black circle) in the context of the closest

1252 relatives. For all trees, branches are scaled to the number of amino acid substitutions per site

1253 and trees were mid-point rooted for clarity only. Numbers at the nodes indicate bootstrap

1254 support over 70% (1000 replicates).

1255 **Supplementary Figure 2.** Multiple sequence alignment conserved amino acid motifs in RNA-

1256 dependent RNA polymerase (RdRp) regions of the mitoviruses discovered in this study along

1257 with reference mitoviruses. The bar above each residue is green if 100% of residues in that

1258 column are identical, green-brown if they are 30%-99%, and red if under 30%. The numbers

1259 under each section correspond to regions containing motifs identified in (72).

1260 **Supplementary Figure 3.** (A) Phylogenetic relationships of the viruses identified within the

1261 virus families *Potyviridae* and *Tombusviridae*. ML phylogenetic trees based upon alignments of

1262 the amino acid sequences of the RdRp protein show the topological position of discovered

1263 virus-like sequences (black circles) from this study in the context of their closest relatives. See

1264 Figure 3 for the colour scheme. All branches are scaled to the number of amino acid

1265 substitutions per site and trees were mid-point rooted for clarity only. An asterisk indicates node  
1266 support of >70% bootstrap support.

1267 **Supplementary Figure 4.** Phylogram of the deltapartitii-like virus (A) coat protein/RNA2 (CP)  
1268 and (B) RNA3/coat protein 2. ML phylogenetic trees show the topological position of the newly  
1269 discovered CP sequences in (black circle) in the context of the closest relatives. All branches  
1270 are scaled to the number of amino acid substitutions per site and trees were mid-point rooted for  
1271 clarity only. Numbers at the nodes indicate bootstrap support over 70% (1000 replicates).

1272 **Supplementary Figure 5.** Tanglegram of rooted phylogenetic trees for select virus families and  
1273 their hosts. Lines and branches are coloured to represent host clade. The cophylo function  
1274 implemented in phytools (v0.7-80) was used to maximise the congruence between the host (left)  
1275 and virus (right) phylogenies.

1276 **Supplementary Table 1.** Clade assignment for all One Thousand Plant Transcriptomes  
1277 Initiative (1KP) species for which a virus was detected.

1278 **Supplementary Table 2.** Summary information for each One Thousand Plant Transcriptomes  
1279 Initiative (1KP) libraries analysed.

1280 **Supplementary Table 3.** Proportion of transcripts and abundance assigned to each plant virus  
1281 family.

1282 **Supplementary Table 4.** Summary table of the viruses discovered in this study

1283 **Supplementary Table 5.** Genome annotation information underlying the annotation graphs

1284 **Supplementary References**

- 1285 1. Xie J, Ghabrial SA. 2012. Molecular characterizations of two mitoviruses co-infecting a  
1286 hyovirulent isolate of the plant pathogenic fungus *Sclerotinia sclerotiorum*. *Virology*  
1287 428:77-85.
